# Supplementary material for: Can harbor seals (Phoca vitulina) discriminate familiar conspecific calls after long periods of separation?
Source: PeerJ. 2021 Nov 15;9:e12431. doi: 10.7717/peerj.12431 (PMC8601051; doi:10.7717/peerj.12431)
Supplement: Supplemental Information 1 — Dataset reporting the results of the video annotation in terms of number of looks, latency, and duration, in response to each experimental condition, and information on each seal’s characteristics (e.g., sex, age, weight), experimental conditions, and responses to playbacks. [file peerj-09-12431-s001.xlsx]

## Sheet: Sheet1
seal_id	trial_nmb	trial_name	sex_pb	length	IOI	regularity	sex	sex_relation	weight	annotator	total_duration	nmb_of_looks	latency	total_durationXsec	nmb_of_looksXsec	latencyXsec
r18-169	0	acclimation					m		32.6	Marlene	38251	6	32831	0.127502908	0.019999933	0.109436302
r18-169	1	f_l_4_iso	F	l	4	iso	m	opp	32.6	Marlene	26836	1	50172	0.348483274	0.012985664	0.651516726
r18-169	2	m_s_4_ran	M	s	4	ran	m	same	32.6	Marlene	41438	2	32199	0.512029063	0.02471302	0.397867266
r18-169	3	f_s_2_ran	F	s	2	ran	m	opp	32.6	Marlene	4116	2	27493	0.093713713	0.045536304	0.6259648
r18-169	4	f_s_4_ran	F	s	4	ran	m	opp	32.6	Marlene	20895	3	5.55	0.262727741	0.03772114	0.069784109
r18-169	5	m_s_4_iso	M	s	4	iso	m	same	32.6	Marlene		0			0
r18-169	6	f_l_2_ran	F	l	2	ran	m	opp	32.6	Marlene	10055	3	4342	0.253357523	0.075591504	0.109406103
r18-169	7	f_l_4_ran	F	l	4	ran	m	opp	32.6	Marlene	14073	2	62889	0.177023321	0.025157866	0.791076505
r18-169	8	m_l_2_ran	M	l	2	ran	m	same	32.6	Marlene		0			0
r18-169	9	f_s_4_iso	F	s	4	iso	m	opp	32.6	Marlene	34265	4	4219	0.425572875	0.049680184	0.052400174
r18-169	10	m_s_2_ran	M	s	2	ran	m	same	32.6	Marlene		0			0
r18-169	11	f_l_2_iso	F	l	2	iso	m	opp	32.6	Marlene		0			0
r18-169	12	m_l_4_ran	M	l	4	ran	m	same	32.6	Marlene		0			0
r18-169	13	f_s_2_iso	F	s	2	iso	m	opp	32.6	Marlene		0			0
r18-169	14	m_s_2_iso	M	s	2	iso	m	same	32.6	Marlene		0			0
r18-169	15	m_l_2_iso	M	l	2	iso	m	same	32.6	Marlene		0			0
r18-169	16	m_l_4_iso	M	l	4	iso	m	same	32.6	Marlene		0			0
r18-169	17	post-playback					m		32.6	Marlene	0.516	1	150459	0.001719994	0.003333322	0.501528328
r18-170	0	acclimation					f		34	Marlene	93.27	14	23116	0.310898964	0.046666511	0.077053076
r18-170	1	m_s_4_ran	M	s	4	ran	f	opp	34	Marlene		0			0
r18-170	2	m_l_2_iso	M	l	2	iso	f	opp	34	Marlene		0			0
r18-170	3	f_s_4_iso	F	s	4	iso	f	same	34	Marlene		0			0
r18-170	4	f_l_2_iso	F	l	2	iso	f	same	34	Marlene	6417	1	34443	0.157048458	0.024473813	0.842951542
r18-170	5	f_l_4_ran	F	l	4	ran	f	same	34	Marlene		0			0
r18-170	6	m_s_2_ran	M	s	2	ran	f	opp	34	Marlene		0			0
r18-170	7	m_l_4_ran	M	l	4	ran	f	opp	34	Marlene		0			0
r18-170	8	f_l_2_ran	F	l	2	ran	f	same	34	Marlene		0			0
r18-170	9	f_s_2_ran	F	s	2	ran	f	same	34	Marlene		0			0
r18-170	10	f_s_2_iso	F	s	2	iso	f	same	34	Marlene		0			0
r18-170	11	f_l_4_iso	F	l	4	iso	f	same	34	Marlene		0			0
r18-170	12	m_s_2_iso	M	s	2	iso	f	opp	34	Marlene	2005	1	12754	0.049589434	0.024732885	0.315443213
r18-170	13	f_s_4_ran	F	s	4	ran	f	same	34	Marlene		0			0
r18-170	14	m_l_2_ran	M	l	2	ran	f	opp	34	Marlene	4026	1	11493	0.099407407	0.024691358	0.283777778
r18-170	15	m_l_4_iso	M	l	4	iso	f	opp	34	Marlene		0			0
r18-170	16	m_s_4_iso	M	s	4	iso	f	opp	34	Marlene		0			0
r18-170	17	post-playback					f		34	Marlene		0			0
r18-174	0	acclimation					m		40.8	Marlene	7928	5	42195	0.026426579	0.016666611	0.140649531
r18-174	1	m_s_4_iso	M	s	4	iso	m	same	40.8	Marlene		0			0
r18-174	2	f_l_4_iso	F	l	4	iso	m	opp	40.8	Marlene		0			0
r18-174	3	m_s_2_ran	M	s	2	ran	m	same	40.8	Marlene		0			0
r18-174	4	m_s_4_ran	M	s	4	ran	m	same	40.8	Marlene		0			0
r18-174	5	f_s_4_iso	F	s	4	iso	m	opp	40.8	Marlene		0			0
r18-174	6	f_l_2_ran	F	l	2	ran	m	opp	40.8	Marlene		0			0
r18-174	7	f_s_4_ran	F	s	4	ran	m	opp	40.8	Marlene		0			0
r18-174	8	f_s_2_iso	F	s	2	iso	m	opp	40.8	Marlene		0			0
r18-174	9	f_s_2_ran	F	s	2	ran	m	opp	40.8	Marlene		0			0
r18-174	10	m_l_2_ran	M	l	2	ran	m	same	40.8	Marlene		0			0
r18-174	11	f_l_4_ran	F	l	4	ran	m	opp	40.8	Marlene		0			0
r18-174	12	m_l_2_iso	M	l	2	iso	m	same	40.8	Marlene	0.5	1	19547	0.012213591	0.024427183	0.477478138
r18-174	13	m_s_2_iso	M	s	2	iso	m	same	40.8	Marlene	0.505	1	17032	0.012481772	0.02471638	0.420969376
r18-174	14	f_l_2_iso	F	l	2	iso	m	opp	40.8	Marlene	2405	1	9913	0.058816337	0.024455857	0.242430912
r18-174	15	m_l_4_ran	M	l	4	ran	m	same	40.8	Marlene		0			0
r18-174	16	m_l_4_iso	M	l	4	iso	m	same	40.8	Marlene	0.995	1	14.19	0.01233726	0.012399256	0.175945443
r18-174	17	post-playback					m		40.8	Marlene	7751	5	83873	0.025836581	0.016666611	0.279575735
r18-176	0	acclimation					f		41.1	Marlene	33265	7	26934	0.110882964	0.023333256	0.089779701
r18-176	1	f_s_4_ran	F	s	4	ran	f	same	41.1	Marlene	13002	1	0.603	0.172896637	0.013297696	0.00801851
r18-176	2	m_s_4_iso	M	s	4	iso	f	opp	41.1	Marlene	36755	2	23256	0.455779867	0.024800972	0.288385705
r18-176	3	m_l_4_iso	M	l	4	iso	f	opp	41.1	Marlene	16006	3	25507	0.197702569	0.037055336	0.315056818
r18-176	4	f_s_2_ran	F	s	2	ran	f	same	41.1	Marlene	32258	1	11762	0.732803271	0.022716947	0.267196729
r18-176	5	f_s_4_iso	F	s	4	iso	f	same	41.1	Marlene	15421	2	46864	0.191493853	0.024835465	0.581944617
r18-176	6	f_l_4_iso	F	l	4	iso	f	same	41.1	Marlene	39.73	2	27731	0.490742228	0.024703862	0.342531405
r18-176	7	m_s_4_ran	M	s	4	ran	f	opp	41.1	Marlene	16373	2	46001	0.202420691	0.024726158	0.568713993
r18-176	8	m_l_2_iso	M	l	2	iso	f	opp	41.1	Marlene	8316	2	2006	0.203728656	0.048996791	0.049143781
r18-176	9	f_l_2_iso	F	l	2	iso	f	same	41.1	Marlene	13063	3	20501	0.319224848	0.073311991	0.500989712
r18-176	10	m_s_2_iso	M	s	2	iso	f	opp	41.1	Marlene	17498	2	12506	0.431420893	0.04931088	0.308340935
r18-176	11	f_l_4_ran	F	l	4	ran	f	same	41.1	Marlene	51206	1	27832	0.647865584	0.012652142	0.352134416
r18-176	12	f_l_2_ran	F	l	2	ran	f	same	41.1	Marlene	24177	1	15506	0.609253333	0.025199708	0.390746667
r18-176	13	m_s_2_ran	M	s	2	ran	f	opp	41.1	Marlene		0			0
r18-176	14	m_l_2_ran	M	l	2	ran	f	opp	41.1	Marlene	10733	2	22764	0.265012346	0.049382716	0.562074074
r18-176	15	m_l_4_ran	M	l	4	ran	f	opp	41.1	Marlene	7242	2	54509	0.09253533	0.025555186	0.696493828
r18-176	16	f_s_2_iso	F	s	2	iso	f	same	41.1	Marlene	18812	1	21758	0.463692384	0.024648755	0.536307616
r18-176	17	post-playback					f		41.1	Marlene	1265	1	295393	0.004216653	0.003333322	0.984640051
r18-178	0	acclimation					m		35	Marlene	5508	4	85394	0.018359939	0.013333289	0.284645718
r18-178	1	m_l_4_ran	M	l	4	ran	m	same	35	Marlene	0.76	1	26.31	0.01018917	0.013406803	0.352732977
r18-178	2	f_s_4_ran	F	s	4	ran	m	opp	35	Marlene	1525	2	70823	0.019215503	0.02520066	0.892393181
r18-178	3	m_s_4_iso	M	s	4	iso	m	same	35	Marlene		0			0
r18-178	4	m_l_4_iso	M	l	4	iso	m	same	35	Marlene	1.53	1	73226	0.018921827	0.012367207	0.905601108
r18-178	5	f_s_4_iso	F	s	4	iso	m	opp	35	Marlene	1756	2	45.56	0.021813394	0.024844412	0.565955702
r18-178	6	f_s_2_ran	F	s	2	ran	m	opp	35	Marlene	0.78	1	6424	0.01783224	0.022861846	0.146864498
r18-178	7	f_s_2_iso	F	s	2	iso	m	opp	35	Marlene	7292	5	8383	0.179557263	0.123119352	0.206421905
r18-178	8	m_l_2_ran	M	l	2	ran	m	same	35	Marlene	15049	7	8956	0.374269442	0.174090378	0.222736203
r18-178	9	f_l_4_ran	F	l	4	ran	m	opp	35	Marlene	12213	6	10.78	0.1541092	0.075710735	0.136026953
r18-178	10	f_l_2_iso	F	l	2	iso	m	opp	35	Marlene	13.21	3	5267	0.325377472	0.073893446	0.129732259
r18-178	11	f_l_4_iso	F	l	4	iso	m	opp	35	Marlene	23226	3	13725	0.286737201	0.03703658	0.169442353
r18-178	12	m_s_4_ran	M	s	4	ran	m	same	35	Marlene		0			0
r18-178	13	f_l_2_ran	F	l	2	ran	m	opp	35	Marlene	25863	2	11544	0.647254617	0.050052555	0.288903349
r18-178	14	m_s_2_iso	M	s	2	iso	m	same	35	Marlene		0			0
r18-178	15	m_l_2_iso	M	l	2	iso	m	same	35	Marlene	37616	3	0.466	0.927027626	0.073933509	0.011484338
r18-178	16	m_s_2_ran	M	s	2	ran	m	same	35	Marlene	21965	2	17175	0.537172903	0.048911714	0.420029347
r18-178	17	post-playback					m		35	Marlene	7546	1	267666	0.025153249	0.003333322	0.892217026
r18-185	0	acclimation					f		36	Marlene	3.27	1	153036	0.019622551	0.00600078	0.918335384
r18-185	1	f_s_4_iso	F	s	4	iso	f	same	36	Marlene		0			0
r18-185	2	f_s_4_ran	F	s	4	ran	f	same	36	Marlene		0			0
r18-185	3	f_l_4_iso	F	l	4	iso	f	same	36	Marlene	8243	1	65755	0.1019013	0.012362162	0.812873955
r18-185	4	m_s_4_iso	M	s	4	iso	f	opp	36	Marlene	14012	1	31764	0.174452191	0.012450199	0.395468127
r18-185	5	m_s_2_iso	M	s	2	iso	f	opp	36	Marlene	6236	1	2868	0.153979111	0.024691968	0.070816563
r18-185	6	f_l_4_ran	F	l	4	ran	f	same	36	Marlene	7041	3	51553	0.088722278	0.037802419	0.649609375
r18-185	7	f_l_2_iso	F	l	2	iso	f	same	36	Marlene	7886	4	6577	0.19267512	0.097730216	0.160692907
r18-185	8	m_l_4_iso	M	l	4	iso	f	opp	36	Marlene	6.71	4	44624	0.082807814	0.049363824	0.550702817
r18-185	9	m_l_2_ran	M	l	2	ran	f	opp	36	Marlene	1495	1	18772	0.037014112	0.024758604	0.464768507
r18-185	10	m_s_4_ran	M	s	4	ran	f	opp	36	Marlene		0			0
r18-185	11	m_l_4_ran	M	l	4	ran	f	opp	36	Marlene	9785	3	14221	0.125095883	0.038353362	0.181807722
r18-185	12	f_s_2_iso	F	s	2	iso	f	same	36	Marlene		0			0
r18-185	13	m_s_2_ran	M	s	2	ran	f	opp	36	Marlene	4.76	2	17999	0.116726747	0.049044852	0.441379141
r18-185	14	f_s_2_ran	F	s	2	ran	f	same	36	Marlene		0			0
r18-185	15	f_l_2_ran	F	l	2	ran	f	same	36	Marlene		0			0
r18-185	16	m_l_2_iso	M	l	2	iso	f	opp	36	Marlene		0			0
r18-185	17	post-playback					f		36	Marlene	1.01	1	290021	0.003366655	0.003333322	0.966733444
r18-188	0	acclimation					f		39.9	Marlene	10731	7	24029	0.035769881	0.023333256	0.0800964
r18-188	1	f_l_4_ran	F	l	4	ran	f	same	39.9	Marlene		0			0
r18-188	2	f_l_4_iso	F	l	4	iso	f	same	39.9	Marlene		0			0
r18-188	3	m_s_2_iso	M	s	2	iso	f	opp	39.9	Marlene		0			0
r18-188	4	f_l_2_iso	F	l	2	iso	f	same	39.9	Marlene	0.49	1	7874	0.011950928	0.024389649	0.192044096
r18-188	5	f_s_2_iso	F	s	2	iso	f	same	39.9	Marlene		0			0
r18-188	6	m_l_4_iso	M	l	4	iso	f	opp	39.9	Marlene		0			0
r18-188	7	f_l_2_ran	F	l	2	ran	f	same	39.9	Marlene	1.46	2	15822	0.036695403	0.050267675	0.39766758
r18-188	8	m_s_2_ran	M	s	2	ran	f	opp	39.9	Marlene	2005	1	22806	0.049118079	0.024497795	0.558696717
r18-188	9	m_s_4_ran	M	s	4	ran	f	opp	39.9	Marlene		0			0
r18-188	10	m_s_4_iso	M	s	4	iso	f	opp	39.9	Marlene	1.53	1	21277	0.019059246	0.012457023	0.265048084
r18-188	11	m_l_4_ran	M	l	4	ran	f	opp	39.9	Marlene		0			0
r18-188	12	f_s_2_ran	F	s	2	ran	f	same	39.9	Marlene	6565	2	25037	0.150232271	0.045767638	0.572942173
r18-188	13	f_s_4_ran	F	s	4	ran	f	same	39.9	Marlene	4486	2	38054	0.056605678	0.025236593	0.480176656
r18-188	14	f_s_4_iso	F	s	4	iso	f	same	39.9	Marlene	6001	3	26783	0.074678315	0.037332935	0.333296
r18-188	15	m_l_2_ran	M	l	2	ran	f	opp	39.9	Marlene	1988	2	14552	0.049305556	0.049603175	0.360912698
r18-188	16	m_l_2_iso	M	l	2	iso	f	opp	39.9	Marlene	2173	2	15806	0.053195917	0.048960807	0.386937257
r18-188	17	post-playback					f		39.9	Marlene	11806	5	8715	0.039353202	0.016666611	0.029049903
r18-189	0	acclimation					m		39.1	Marlene	65046	9	12541	0.216819277	0.0299999	0.041803194
r18-189	1	f_s_4_iso	F	s	4	iso	m	opp	39.1	Marlene		0			0
r18-189	2	f_l_4_ran	F	l	4	ran	m	opp	39.1	Marlene	23547	3	18023	0.296714928	0.037802896	0.227107196
r18-189	3	m_l_2_ran	M	l	2	ran	m	same	39.1	Marlene		0			0
r18-189	4	f_s_2_iso	F	s	2	iso	m	opp	39.1	Marlene		0			0
r18-189	5	f_l_2_iso	F	l	2	iso	m	opp	39.1	Marlene	8496	1	15579	0.206670072	0.024325573	0.378968109
r18-189	6	f_s_4_ran	F	s	4	ran	m	opp	39.1	Marlene	3.78	1	70263	0.047723657	0.012625306	0.887091887
r18-189	7	f_l_2_ran	F	l	2	ran	m	opp	39.1	Marlene		0			0
r18-189	8	f_l_4_iso	F	l	4	iso	m	opp	39.1	Marlene		0			0
r18-189	9	m_s_2_iso	M	s	2	iso	m	same	39.1	Marlene	6731	2	21482	0.167233969	0.049690676	0.533727546
r18-189	10	m_s_4_iso	M	s	4	iso	m	same	39.1	Marlene	8332	3	41379	0.103323413	0.037202381	0.51313244
r18-189	11	m_s_4_ran	M	s	4	ran	m	same	39.1	Marlene	4733	2	21393	0.058511559	0.024724935	0.264470268
r18-189	12	f_s_2_ran	F	s	2	ran	m	opp	39.1	Marlene	30664	3	2825	0.701051669	0.068587106	0.064586191
r18-189	13	m_l_2_iso	M	l	2	iso	m	same	39.1	Marlene	14523	2	19098	0.355102939	0.048902147	0.4669666
r18-189	14	m_s_2_ran	M	s	2	ran	m	same	39.1	Marlene	17428	4	1263	0.426206256	0.097821036	0.030886992
r18-189	15	m_l_4_iso	M	l	4	iso	m	same	39.1	Marlene	31221	3	25039	0.385968599	0.037087403	0.309543825
r18-189	16	m_l_4_ran	M	l	4	ran	m	same	39.1	Marlene		0			0
r18-189	17	post-playback					m		39.1	Marlene	40063	2	167065	0.133542888	0.006666644	0.556881477
r18-192	0	acclimation					m		44.2	Marlene		0			0
r18-192	1	f_l_4_ran	F	l	4	ran	m	opp	44.2	Marlene		0			0
r18-192	2	f_l_4_iso	F	l	4	iso	m	opp	44.2	Marlene		0			0
r18-192	3	m_l_2_ran	M	l	2	ran	m	same	44.2	Marlene	2746	1	16145	0.067782385	0.024684044	0.398523894
r18-192	4	m_l_2_iso	M	l	2	iso	m	same	44.2	Marlene		0			0
r18-192	5	f_s_4_iso	F	s	4	iso	m	opp	44.2	Marlene		0			0
r18-192	6	f_s_2_iso	F	s	2	iso	m	opp	44.2	Marlene		0			0
r18-192	7	f_l_2_iso	F	l	2	iso	m	opp	44.2	Marlene	1255	1	21303	0.030723658	0.024481003	0.521518801
r18-192	8	m_s_2_iso	M	s	2	iso	m	same	44.2	Marlene	0.533	1	38652	0.013151402	0.024674299	0.953711015
r18-192	9	m_s_2_ran	M	s	2	ran	m	same	44.2	Marlene		0			0
r18-192	10	m_l_4_ran	M	l	4	ran	m	same	44.2	Marlene		0			0
r18-192	11	m_s_4_ran	M	s	4	ran	m	same	44.2	Marlene		0			0
r18-192	12	f_l_2_ran	F	l	2	ran	m	opp	44.2	Marlene	0.75	1	27063	0.018848483	0.025131311	0.680128672
r18-192	13	f_s_4_ran	F	s	4	ran	m	opp	44.2	Marlene		0			0
r18-192	14	m_s_4_iso	M	s	4	iso	m	same	44.2	Marlene		0			0
r18-192	15	m_l_4_iso	M	l	4	iso	m	same	44.2	Marlene		0			0
r18-192	16	f_s_2_ran	F	s	2	ran	m	opp	44.2	Marlene	0.996	1	42609	0.022791762	0.022883295	0.975034325
r18-192	17	post-playback					m		44.2	Marlene		0			0
r18-194	0	acclimation					f		37.3	Marlene	103.36	8	0.073	0.344532185	0.026666578	0.000243333
r18-194	1	m_l_2_ran	M	l	2	ran	f	opp	37.3	Marlene		0			0
r18-194	2	m_s_4_ran	M	s	4	ran	f	opp	37.3	Marlene		0			0
r18-194	3	f_l_2_iso	F	l	2	iso	f	same	37.3	Marlene	1202	1	39758	0.029345703	0.024414062	0.970654297
r18-194	4	f_s_2_ran	F	s	2	ran	f	same	37.3	Marlene		0			0
r18-194	5	m_l_4_ran	M	l	4	ran	f	opp	37.3	Marlene		0			0
r18-194	6	f_l_4_iso	F	l	4	iso	f	same	37.3	Marlene	2881	2	57257	0.035616269	0.024724935	0.707837804
r18-194	7	m_s_2_ran	M	s	2	ran	f	opp	37.3	Marlene	1276	1	39753	0.031099954	0.024373004	0.968900046
r18-194	8	m_s_2_iso	M	s	2	iso	f	opp	37.3	Marlene	3942	2	28006	0.097456056	0.04944498	0.692378056
r18-194	9	m_l_2_iso	M	l	2	iso	f	opp	37.3	Marlene	2814	1	37758	0.069358178	0.02464754	0.930641822
r18-194	10	f_l_4_ran	F	l	4	ran	f	same	37.3	Marlene	23998	1	43761	0.302116249	0.012589226	0.550917125
r18-194	11	f_s_2_iso	F	s	2	iso	f	same	37.3	Marlene	3485	3	22006	0.085605502	0.073691968	0.540555146
r18-194	12	f_s_4_iso	F	s	4	iso	f	same	37.3	Marlene	9997	1	31009	0.124354716	0.012439203	0.385727258
r18-194	13	f_s_4_ran	F	s	4	ran	f	same	37.3	Marlene	23716	2	19781	0.299255521	0.025236593	0.249602524
r18-194	14	m_s_4_iso	M	s	4	iso	f	opp	37.3	Marlene	2005	1	29754	0.024928509	0.012433172	0.369936591
r18-194	15	f_l_2_ran	F	l	2	ran	f	same	37.3	Marlene	17889	3	7356	0.450105676	0.075483092	0.185084541
r18-194	16	m_l_4_iso	M	l	4	iso	f	opp	37.3	Marlene	54.58	1	26489	0.673253648	0.012335171	0.326746352
r18-194	17	post-playback					f		37.3	Marlene	1965	1	140351	0.006549978	0.003333322	0.467835107
r18-204	0	acclimation					f		40.9	Marlene	52836	13	33339	0.176119413	0.043333189	0.11112963
r18-204	1	m_l_2_ran	M	l	2	ran	f	opp	40.9	Marlene		0			0
r18-204	2	m_l_4_iso	M	l	4	iso	f	opp	40.9	Marlene	2.5	1	42082	0.03093332	0.012373328	0.520694391
r18-204	3	f_l_2_ran	F	l	2	ran	f	same	40.9	Marlene		0			0
r18-204	4	f_l_2_iso	F	l	2	iso	f	same	40.9	Marlene	9751	2	9332	0.23911231	0.049043649	0.228837666
r18-204	5	m_s_2_iso	M	s	2	iso	f	opp	40.9	Marlene	1.25	1	35712	0.030894711	0.024715769	0.88264953
r18-204	6	m_l_4_ran	M	l	4	ran	f	opp	40.9	Marlene	1005	1	61651	0.012837052	0.012773187	0.787479723
r18-204	7	f_l_4_ran	F	l	4	ran	f	same	40.9	Marlene	7728	2	4.69	0.097244243	0.02516673	0.059015981
r18-204	8	m_s_4_iso	M	s	4	iso	f	opp	40.9	Marlene	9959	1	70.47	0.123823497	0.012433326	0.876176503
r18-204	9	f_s_2_ran	F	s	2	ran	f	same	40.9	Marlene	0.285	1	31532	0.006501209	0.02281126	0.719284639
r18-204	10	m_l_2_iso	M	l	2	iso	f	opp	40.9	Marlene		0			0
r18-204	11	f_l_4_iso	F	l	4	iso	f	same	40.9	Marlene		0			0
r18-204	12	m_s_4_ran	M	s	4	ran	f	opp	40.9	Marlene		0			0
r18-204	13	f_s_4_ran	F	s	4	ran	f	same	40.9	Marlene	2	1	68561	0.02516673	0.012583365	0.862728073
r18-204	14	f_s_4_iso	F	s	4	iso	f	same	40.9	Marlene	2001	1	40115	0.024822915	0.012405255	0.497636799
r18-204	15	f_s_2_iso	F	s	2	iso	f	same	40.9	Marlene	8512	2	5557	0.210901883	0.049554014	0.137685828
r18-204	16	m_s_2_ran	M	s	2	ran	f	opp	40.9	Marlene	9002	1	0.749	0.219936477	0.024431957	0.018299536
r18-204	17	post-playback					f		40.9	Marlene	10733	2	42412	0.035776547	0.006666644	0.141372862
r18-216	0	acclimation					m		39.5	Marlene	18805	2	71197	0.062683124	0.006666644	0.237322542
r18-216	1	f_s_2_ran	F	s	2	ran	m	opp	39.5	Marlene		0			0
r18-216	2	f_l_4_ran	F	l	4	ran	m	opp	39.5	Marlene		0			0
r18-216	3	f_s_2_iso	F	s	2	iso	m	opp	39.5	Marlene		0			0
r18-216	4	m_l_4_ran	M	l	4	ran	m	same	39.5	Marlene		0			0
r18-216	5	f_s_4_ran	F	s	4	ran	m	opp	39.5	Marlene		0			0
r18-216	6	m_s_4_ran	M	s	4	ran	m	same	39.5	Marlene		0			0
r18-216	7	m_l_2_ran	M	l	2	ran	m	same	39.5	Marlene	7422	1	33008	0.183576552	0.024734108	0.816423448
r18-216	8	m_l_2_iso	M	l	2	iso	m	same	39.5	Marlene		0			0
r18-216	9	m_l_4_iso	M	l	4	iso	m	same	39.5	Marlene		0			0
r18-216	10	f_l_4_iso	F	l	4	iso	m	opp	39.5	Marlene		0			0
r18-216	11	f_s_4_iso	F	s	4	iso	m	opp	39.5	Marlene		0			0
r18-216	12	f_l_2_iso	F	l	2	iso	m	opp	39.5	Marlene	16002	1	19503	0.389257827	0.024325573	0.474421659
r18-216	13	m_s_4_iso	M	s	4	iso	m	same	39.5	Marlene		0			0
r18-216	14	m_s_2_ran	M	s	2	ran	m	same	39.5	Marlene		0			0
r18-216	15	f_l_2_ran	F	l	2	ran	m	opp	39.5	Marlene		0			0
r18-216	16	m_s_2_iso	M	s	2	iso	m	same	39.5	Marlene		0			0
r18-216	17	post-playback					m		39.5	Marlene		0			0
r18-227	0	acclimation					m		38.6	Marlene	20281	9	2364	0.067603108	0.0299999	0.007879974
r18-227	1	f_s_4_ran	F	s	4	ran	m	opp	38.6	Marlene		0			0
r18-227	2	f_l_2_iso	F	l	2	iso	m	opp	38.6	Marlene	2246	1	26039	0.0550207	0.024497195	0.637882462
r18-227	3	f_s_4_iso	F	s	4	iso	m	opp	38.6	Marlene	7992	2	17354	0.099364673	0.024866034	0.215762579
r18-227	4	m_l_2_ran	M	l	2	ran	m	same	38.6	Marlene	9336	3	11347	0.230923347	0.07420416	0.280664869
r18-227	5	f_l_4_ran	F	l	4	ran	m	opp	38.6	Marlene		0			0
r18-227	6	m_s_4_iso	M	s	4	iso	m	same	38.6	Marlene	6735	3	61256	0.083820784	0.037336652	0.762364655
r18-227	7	f_s_2_iso	F	s	2	iso	m	opp	38.6	Marlene	16995	1	5256	0.421492523	0.024800972	0.13035391
r18-227	8	m_l_4_ran	M	l	4	ran	m	same	38.6	Marlene		0			0
r18-227	9	f_l_2_ran	F	l	2	ran	m	opp	38.6	Marlene	11749	3	2254	0.294468533	0.075189854	0.056492644
r18-227	10	m_l_4_iso	M	l	4	iso	m	same	38.6	Marlene	1246	1	54761	0.015417358	0.012373481	0.677584202
r18-227	11	m_s_4_ran	M	s	4	ran	m	same	38.6	Marlene		0			0
r18-227	12	m_s_2_iso	M	s	2	iso	m	same	38.6	Marlene	28.43	3	6757	0.703155916	0.074198655	0.167120103
r18-227	13	f_l_4_iso	F	l	4	iso	m	opp	38.6	Marlene	40.43	8	0.348	0.498957163	0.098730084	0.004294759
r18-227	14	m_s_2_ran	M	s	2	ran	m	same	38.6	Marlene	2.5	1	37507	0.061187528	0.024475011	0.917984238
r18-227	15	m_l_2_iso	M	l	2	iso	m	same	38.6	Marlene		0			0
r18-227	16	f_s_2_ran	F	s	2	ran	m	opp	38.6	Marlene		0			0
r18-227	17	post-playback					m		38.6	Marlene		0			0
r18-228	0	acclimation					m		?	Marlene	87312	17	0.018	0.29103903	0.056666478	0.00006
r18-228	1	f_s_4_iso	F	s	4	iso	m	opp	?	Marlene		0			0
r18-228	2	f_l_4_iso	F	l	4	iso	m	opp	?	Marlene		0			0
r18-228	3	m_s_2_iso	M	s	2	iso	m	same	?	Marlene		0			0
r18-228	4	m_s_4_iso	M	s	4	iso	m	same	?	Marlene		0			0
r18-228	5	m_l_2_ran	M	l	2	ran	m	same	?	Marlene		0			0
r18-228	6	m_s_4_ran	M	s	4	ran	m	same	?	Marlene		0			0
r18-228	7	f_s_2_ran	F	s	2	ran	m	opp	?	Marlene		0			0
r18-228	8	f_l_4_ran	F	l	4	ran	m	opp	?	Marlene	3253	1	74504	0.041084645	0.012629771	0.940968451
r18-228	9	m_l_4_iso	M	l	4	iso	m	same	?	Marlene	57257	2	1504	0.707243262	0.024704168	0.018577534
r18-228	10	f_l_2_ran	F	l	2	ran	m	opp	?	Marlene	13003	2	5752	0.327680056	0.050400685	0.144952371
r18-228	11	m_l_2_iso	M	l	2	iso	m	same	?	Marlene	16748	2	11258	0.40828864	0.048756704	0.274451487
r18-228	12	f_l_2_iso	F	l	2	iso	m	opp	?	Marlene	19002	4	1609	0.465051395	0.097895252	0.039378365
r18-228	13	f_s_4_ran	F	s	4	ran	m	opp	?	Marlene	13655	4	0.821	0.172300665	0.050472549	0.010359491
r18-228	14	m_s_2_ran	M	s	2	ran	m	same	?	Marlene	30739	2	1253	0.7543498	0.049080959	0.030749221
r18-228	15	f_s_2_iso	F	s	2	iso	m	opp	?	Marlene	6245	1	27262	0.154893596	0.024802818	0.676174413
r18-228	16	m_l_4_ran	M	l	4	ran	m	same	?	Marlene		0			0
r18-228	17	post-playback					m		?	Marlene	28517	6	73851	0.09505635	0.019999933	0.246169179
r18-231	0	acclimation					m		36.1	Marlene	25312	12	3359	0.082767912	0.039238896	0.010983621
r18-231	1	m_l_4_ran	M	l	4	ran	m	same	36.1	Marlene		0			0
r18-231	2	m_l_4_iso	M	l	4	iso	m	same	36.1	Marlene	18508	1	40362	0.228810207	0.012362773	0.498986253
r18-231	3	f_l_4_ran	F	l	4	ran	m	opp	36.1	Marlene	0.501	1	63316	0.006321767	0.012618297	0.798940063
r18-231	4	f_s_4_iso	F	s	4	iso	m	opp	36.1	Marlene	7647	1	72964	0.094862984	0.012405255	0.905137016
r18-231	5	m_l_2_ran	M	l	2	ran	m	same	36.1	Marlene	2475	2	21645	0.061002662	0.04929508	0.533496007
r18-231	6	f_s_4_ran	F	s	4	ran	m	opp	36.1	Marlene		0			0
r18-231	7	m_s_4_ran	M	s	4	ran	m	same	36.1	Marlene	3736	2	53757	0.046128582	0.024694102	0.663740416
r18-231	8	m_s_2_ran	M	s	2	ran	m	same	36.1	Marlene	4.95	2	9899	0.121267057	0.048996791	0.242509616
r18-231	9	m_s_4_iso	M	s	4	iso	m	same	36.1	Marlene	43518	1	15492	0.539671123	0.012401101	0.19211786
r18-231	10	f_l_2_iso	F	l	2	iso	m	opp	36.1	Marlene	5017	3	10637	0.1217748	0.072817301	0.258185878
r18-231	11	f_s_2_iso	F	s	2	iso	m	opp	36.1	Marlene	6768	2	31626	0.167570378	0.049518433	0.783034985
r18-231	12	m_s_2_iso	M	s	2	iso	m	same	36.1	Marlene	17631	1	14332	0.436508133	0.024757991	0.354831522
r18-231	13	f_l_4_iso	F	l	4	iso	m	opp	36.1	Marlene	10599	2	15368	0.130916502	0.024703557	0.189822134
r18-231	14	f_l_2_ran	F	l	2	ran	m	opp	36.1	Marlene	10281	2	15.22	0.257475582	0.050087653	0.381167042
r18-231	15	m_l_2_iso	M	l	2	iso	m	same	36.1	Marlene	3326	1	36817	0.081903026	0.024625083	0.906621685
r18-231	16	f_s_2_ran	F	s	2	ran	m	opp	36.1	Marlene		0			0
r18-231	17	post-playback					m		36.1	Marlene	13191	3	97803	0.043969853	0.009999967	0.326008913
r18-235	0	acclimation					f		32.1	Marlene	11621	14	5246	0.038736538	0.046666511	0.017486608
r18-235	1	m_s_2_ran	M	s	2	ran	f	opp	32.1	Marlene	8247	3	9658	0.201682522	0.073365777	0.236188892
r18-235	2	m_s_4_iso	M	s	4	iso	f	opp	32.1	Marlene	9.77	7	4678	0.121472088	0.087032202	0.058162377
r18-235	3	m_l_2_iso	M	l	2	iso	f	opp	32.1	Marlene	5904	5	13087	0.141542002	0.119869582	0.313746644
r18-235	4	m_s_4_ran	M	s	4	ran	f	opp	32.1	Marlene	5498	4	21084	0.06784304	0.049358342	0.260167818
r18-235	5	f_l_4_iso	F	l	4	iso	f	same	32.1	Marlene	12.51	8	14134	0.154786504	0.098984175	0.174880291
r18-235	6	f_s_2_ran	F	s	2	ran	f	same	32.1	Marlene	1736	3	2253	0.0397254	0.068649886	0.051556064
r18-235	7	f_s_4_iso	F	s	4	iso	f	same	32.1	Marlene	13294	11	8546	0.165144909	0.13664766	0.106162809
r18-235	8	f_l_2_iso	F	l	2	iso	f	same	32.1	Marlene	11672	10	1.52	0.283935	0.243261652	0.036975771
r18-235	9	f_l_2_ran	F	l	2	ran	f	same	32.1	Marlene	7604	8	1953	0.19109849	0.201050489	0.049081451
r18-235	10	f_s_2_iso	F	s	2	iso	f	same	32.1	Marlene	1.5	2	4.52	0.037010536	0.049347381	0.111525081
r18-235	11	f_s_4_ran	F	s	4	ran	f	same	32.1	Marlene	2	2	6224	0.025143949	0.025143949	0.07824797
r18-235	12	m_l_4_ran	M	l	4	ran	f	opp	32.1	Marlene	9339	12	23498	0.119194394	0.153156948	0.29990683
r18-235	13	m_s_2_iso	M	s	2	iso	f	opp	32.1	Marlene	3016	3	0.11	0.074675646	0.074279489	0.002723581
r18-235	14	m_l_2_ran	M	l	2	ran	f	opp	32.1	Marlene	8125	8	10543	0.20028101	0.197199763	0.259884638
r18-235	15	m_l_4_iso	M	l	4	iso	f	opp	32.1	Marlene	8227	8	8559	0.101706021	0.09889974	0.10581036
r18-235	16	f_l_4_ran	F	l	4	ran	f	same	32.1	Marlene	7546	7	1178	0.094955266	0.088084662	0.01482339
r18-235	17	post-playback					f		32.1	Marlene	18432	17	9851	0.061439795	0.056666478	0.032836557
r18-256	0	acclimation					f		36.7	Marlene	142761	20	24166	0.475868414	0.066666444	0.080553065
r18-256	1	m_l_2_ran	M	l	2	ran	f	opp	36.7	Marlene	27761	4	3529	0.689063741	0.099285147	0.087594321
r18-256	2	m_l_4_ran	M	l	4	ran	f	opp	36.7	Marlene	2	2	17647	0.02549752	0.02549752	0.224977371
r18-256	3	f_s_2_iso	F	s	2	iso	f	same	36.7	Marlene	2011	1	12041	0.049654321	0.024691358	0.297308642
r18-256	4	m_s_2_ran	M	s	2	ran	f	opp	36.7	Marlene	6502	1	20795	0.160108348	0.024624477	0.512065994
r18-256	5	m_l_2_iso	M	l	2	iso	f	opp	36.7	Marlene	13713	4	3421	0.334806387	0.097661019	0.083524586
r18-256	6	f_s_2_ran	F	s	2	ran	f	same	36.7	Marlene	4996	1	35.05	0.114613443	0.022941042	0.804083505
r18-256	7	f_s_4_ran	F	s	4	ran	f	same	36.7	Marlene	0.505	1	31294	0.006363487	0.012600965	0.394334606
r18-256	8	m_s_4_ran	M	s	4	ran	f	opp	36.7	Marlene		0			0
r18-256	9	f_l_4_ran	F	l	4	ran	f	same	36.7	Marlene	2245	2	61044	0.028303433	0.02521464	0.76960123
r18-256	10	m_l_4_iso	M	l	4	iso	f	opp	36.7	Marlene	4991	1	52104	0.061808815	0.012384054	0.645258765
r18-256	11	f_l_2_iso	F	l	2	iso	f	same	36.7	Marlene	4481	2	16799	0.108812316	0.048566086	0.407930842
r18-256	12	f_l_2_ran	F	l	2	ran	f	same	36.7	Marlene		0			0
r18-256	13	f_s_4_iso	F	s	4	iso	f	same	36.7	Marlene		0			0
r18-256	14	m_s_4_iso	M	s	4	iso	f	opp	36.7	Marlene	16278	2	12805	0.202382136	0.024865725	0.159202805
r18-256	15	m_s_2_iso	M	s	2	iso	f	opp	36.7	Marlene	1001	1	23297	0.024783976	0.024759217	0.57681547
r18-256	16	f_l_4_iso	F	l	4	iso	f	same	36.7	Marlene	0.991	2	14305	0.012234719	0.024691663	0.176607119
r18-256	17	post-playback					f		36.7	Marlene	18032	8	99981	0.054482115	0.024171302	0.302083868
r18-258	0	acclimation					f		37.4	Marlene	19996	10	13283	0.067513911	0.033763708	0.044848333
r18-258	1	f_l_2_iso	F	l	2	iso	f	same	37.4	Marlene	15177	2	1445	0.370541273	0.048829317	0.035279182
r18-258	2	m_l_4_ran	M	l	4	ran	f	opp	37.4	Marlene	10761	2	1.1	0.137138706	0.025488097	0.014018453
r18-258	3	m_l_2_iso	M	l	2	iso	f	opp	37.4	Marlene	3	1	1608	0.073367572	0.024455857	0.039325018
r18-258	4	m_l_4_iso	M	l	4	iso	f	opp	37.4	Marlene	17	4	1145	0.209977644	0.049406504	0.014142612
r18-258	5	m_l_2_ran	M	l	2	ran	f	opp	37.4	Marlene	17995	5	1.08	0.444496591	0.123505582	0.026677206
r18-258	6	m_s_4_ran	M	s	4	ran	f	opp	37.4	Marlene		0			0
r18-258	7	f_l_4_iso	F	l	4	iso	f	same	37.4	Marlene	0.765	1	1352	0.009465596	0.012373328	0.01672874
r18-258	8	f_s_2_ran	F	s	2	ran	f	same	37.4	Marlene	4504	2	9507	0.103163151	0.04580957	0.217755789
r18-258	9	f_s_4_iso	F	s	4	iso	f	same	37.4	Marlene	1.99	2	4755	0.024742319	0.024866653	0.059120466
r18-258	10	m_s_4_iso	M	s	4	iso	f	opp	37.4	Marlene	9251	4	8755	0.114860754	0.049664146	0.1087024
r18-258	11	f_l_4_ran	F	l	4	ran	f	same	37.4	Marlene	5696	5	1393	0.071755206	0.062987365	0.01754828
r18-258	12	m_s_2_ran	M	s	2	ran	f	opp	37.4	Marlene	4.01	2	7259	0.098581508	0.049167834	0.178454655
r18-258	13	f_s_2_iso	F	s	2	iso	f	same	37.4	Marlene	5266	2	19257	0.130382035	0.049518433	0.476788234
r18-258	14	f_s_4_ran	F	s	4	ran	f	same	37.4	Marlene		0			0
r18-258	15	f_l_2_ran	F	l	2	ran	f	same	37.4	Marlene	4255	1	1491	0.106861219	0.02511427	0.037445376
r18-258	16	m_s_2_iso	M	s	2	iso	f	opp	37.4	Marlene	1.25	1	35505	0.030704986	0.024563989	0.872144436
r18-258	17	post-playback					f		37.4	Marlene	8757	1	84981	0.029189903	0.003333322	0.283269056
r18-265	0	acclimation					f		34.7	Marlene	14039	3	65.34	0.052244166	0.011164078	0.243153629
r18-265	1	m_s_4_ran	M	s	4	ran	f	opp	34.7	Marlene	15239	1	65649	0.188396301	0.012362773	0.811603699
r18-265	2	f_l_4_ran	F	l	4	ran	f	same	34.7	Marlene		0			0
r18-265	3	m_s_4_iso	M	s	4	iso	f	opp	34.7	Marlene	3013	2	57288	0.037511516	0.024899778	0.713229252
r18-265	4	m_l_2_ran	M	l	2	ran	f	opp	34.7	Marlene		0			0
r18-265	5	f_l_4_iso	F	l	4	iso	f	same	34.7	Marlene	30739	2	25302	0.379343963	0.024681607	0.312247014
r18-265	6	f_s_2_iso	F	s	2	iso	f	same	34.7	Marlene		0			0
r18-265	7	m_s_2_iso	M	s	2	iso	f	opp	34.7	Marlene	1505	1	15296	0.037030658	0.024605088	0.376359431
r18-265	8	m_l_4_iso	M	l	4	iso	f	opp	34.7	Marlene	0.51	1	33799	0.006318215	0.012388657	0.418724216
r18-265	9	f_s_4_iso	F	s	4	iso	f	same	34.7	Marlene	2058	1	77693	0.02556363	0.012421589	0.965070493
r18-265	10	m_l_4_ran	M	l	4	ran	f	opp	34.7	Marlene	28503	1	7.26	0.368398604	0.012924906	0.09383482
r18-265	11	f_l_2_ran	F	l	2	ran	f	same	34.7	Marlene	5975	1	33904	0.14982823	0.025075854	0.85017177
r18-265	12	m_s_2_ran	M	s	2	ran	f	opp	34.7	Marlene	9018	3	18445	0.221143235	0.073567277	0.452316143
r18-265	13	f_s_2_ran	F	s	2	ran	f	same	34.7	Marlene	1	1	32557	0.022769189	0.022769189	0.741296478
r18-265	14	f_l_2_iso	F	l	2	iso	f	same	34.7	Marlene	5.99	1	27549	0.146208109	0.024408699	0.672435256
r18-265	15	m_l_2_iso	M	l	2	iso	f	opp	34.7	Marlene		0			0
r18-265	16	f_s_4_ran	F	s	4	ran	f	same	34.7	Marlene		0			0
r18-265	17	post-playback					f		34.7	Marlene		0			0
r19-003	0	acclimation					f		34.5	Marlene	48131	45	2531	0.159926501	0.149523022	0.008409839
r19-003	1	m_s_4_iso	M	s	4	iso	f	opp	34.5	Marlene	4422	4	0.119	0.054878503	0.049641341	0.00147683
r19-003	2	m_s_4_ran	M	s	4	ran	f	opp	34.5	Marlene	34492	17	1354	0.426611916	0.210263324	0.016746855
r19-003	3	m_l_2_ran	M	l	2	ran	f	opp	34.5	Marlene	21763	5	0.641	0.536444083	0.123246814	0.015800242
r19-003	4	m_l_4_ran	M	l	4	ran	f	opp	34.5	Marlene	31668	9	6743	0.403933724	0.114797383	0.08600875
r19-003	5	m_s_2_ran	M	s	2	ran	f	opp	34.5	Marlene	21779	9	0.892	0.533524411	0.220474756	0.021851498
r19-003	6	f_l_4_iso	F	l	4	iso	f	same	34.5	Marlene	35357	12	0.823	0.436129271	0.148020229	0.010151721
r19-003	7	f_l_2_ran	F	l	2	ran	f	same	34.5	Marlene	19661	8	1127	0.495476424	0.201607822	0.028401502
r19-003	8	f_l_4_ran	F	l	4	ran	f	same	34.5	Marlene	31067	17	0.694	0.391474187	0.214216409	0.00874507
r19-003	9	m_l_4_iso	M	l	4	iso	f	opp	34.5	Marlene	24274	10	2422	0.299416561	0.12334867	0.029875048
r19-003	10	m_l_2_iso	M	l	2	iso	f	opp	34.5	Marlene	12.8	6	2882	0.31272905	0.146591742	0.0704129
r19-003	11	f_s_2_iso	F	s	2	iso	f	same	34.5	Marlene	2.02	1	23679	0.049876543	0.024691358	0.584666667
r19-003	12	f_s_4_ran	F	s	4	ran	f	same	34.5	Marlene	22508	6	20216	0.282810007	0.075389197	0.254011334
r19-003	13	m_s_2_iso	M	s	2	iso	f	opp	34.5	Marlene	14321	5	8033	0.354840308	0.123888104	0.199038628
r19-003	14	f_s_2_ran	F	s	2	ran	f	same	34.5	Marlene	6497	2	6307	0.148669367	0.045765543	0.14432164
r19-003	15	f_s_4_iso	F	s	4	iso	f	same	34.5	Marlene	10494	5	11299	0.130654017	0.062251771	0.140676552
r19-003	16	f_l_2_iso	F	l	2	iso	f	same	34.5	Marlene	12985	6	1002	0.317024341	0.146487951	0.024463488
r19-003	17	post-playback					f		34.5	Marlene	69067	29	7138	0.230222566	0.096666344	0.023793254
r19-011	0	acclimation					f		35.5	Marlene	74139	12	43092	0.266199656	0.043086579	0.154723905
r19-011	1	m_l_4_iso	M	l	4	iso	f	opp	35.5	Marlene	3579	1	77082	0.044370886	0.012397565	0.955629114
r19-011	2	f_s_2_iso	F	s	2	iso	f	same	35.5	Marlene	3.02	2	30192	0.075105695	0.049738871	0.750857996
r19-011	3	f_s_2_ran	F	s	2	ran	f	same	35.5	Marlene	32.24	4	2.55	0.740808824	0.091911765	0.05859375
r19-011	4	f_l_2_ran	F	l	2	ran	f	same	35.5	Marlene	19037	4	1505	0.478436793	0.100527771	0.037823574
r19-011	5	m_l_4_ran	M	l	4	ran	f	opp	35.5	Marlene	56691	1	21.78	0.722445235	0.012743561	0.277554765
r19-011	6	f_l_2_iso	F	l	2	iso	f	same	35.5	Marlene	12593	2	27103	0.307664118	0.04886272	0.662163153
r19-011	7	m_s_4_iso	M	s	4	iso	f	opp	35.5	Marlene		0			0
r19-011	8	m_s_4_ran	M	s	4	ran	f	opp	35.5	Marlene	36412	1	44508	0.449975284	0.012357884	0.550024716
r19-011	9	f_l_4_iso	F	l	4	iso	f	same	35.5	Marlene	48804	2	30264	0.603852959	0.024746044	0.374457134
r19-011	10	m_s_2_ran	M	s	2	ran	f	opp	35.5	Marlene	4315	3	33141	0.105349252	0.073243976	0.809126199
r19-011	11	f_s_4_iso	F	s	4	iso	f	same	35.5	Marlene	4492	2	48004	0.055864393	0.024872838	0.596997848
r19-011	12	m_l_2_iso	M	l	2	iso	f	opp	35.5	Marlene	19322	5	0.858	0.472987197	0.122396025	0.021003158
r19-011	13	f_s_4_ran	F	s	4	ran	f	same	35.5	Marlene		0			0
r19-011	14	m_s_2_iso	M	s	2	iso	f	opp	35.5	Marlene	20738	5	1261	0.508433853	0.122585074	0.030915956
r19-011	15	f_l_4_ran	F	l	4	ran	f	same	35.5	Marlene	51124	4	2913	0.644764223	0.050447087	0.036738091
r19-011	16	m_l_2_ran	M	l	2	ran	f	opp	35.5	Marlene		0			0
r19-011	17	post-playback					f		35.5	Marlene		0			0
r19-026	0	acclimation					m		40	Marlene	30191	13	3778	0.100636331	0.043333189	0.012593291
r19-026	1	m_s_2_ran	M	s	2	ran	m	same	40	Marlene	0.46	1	40145	0.01126071	0.024479804	0.982741738
r19-026	2	m_s_4_iso	M	s	4	iso	m	same	40	Marlene	0.26	1	25813	0.00322861	0.012417733	0.32053893
r19-026	3	m_l_4_ran	M	l	4	ran	m	same	40	Marlene	0.5	1	7972	0.006368697	0.012737393	0.101542498
r19-026	4	f_s_4_iso	F	s	4	iso	m	opp	40	Marlene	1236	1	52963	0.0153674	0.012433172	0.658498073
r19-026	5	f_s_4_ran	F	s	4	ran	m	opp	40	Marlene	4226	4	6653	0.053345115	0.0504923	0.083981318
r19-026	6	f_l_4_ran	F	l	4	ran	m	opp	40	Marlene	7546	5	18422	0.095121644	0.063027858	0.232219841
r19-026	7	f_l_2_ran	F	l	2	ran	m	opp	40	Marlene	7512	4	14.78	0.188459609	0.100351229	0.370797792
r19-026	8	m_l_4_iso	M	l	4	iso	m	same	40	Marlene	7486	5	23.64	0.092626734	0.06186664	0.292505475
r19-026	9	m_s_4_ran	M	s	4	ran	m	same	40	Marlene	4555	3	14658	0.056435926	0.037169655	0.181610933
r19-026	10	m_s_2_iso	M	s	2	iso	m	same	40	Marlene	0.6	2	15862	0.014789253	0.04929751	0.390978556
r19-026	11	f_s_2_iso	F	s	2	iso	m	opp	40	Marlene	4503	3	7.46	0.111380445	0.07420416	0.184521012
r19-026	12	f_l_4_iso	F	l	4	iso	m	opp	40	Marlene	15056	4	14832	0.185881133	0.049383935	0.183115632
r19-026	13	f_s_2_ran	F	s	2	ran	m	opp	40	Marlene	5755	2	2304	0.132022665	0.04588103	0.052854947
r19-026	14	f_l_2_iso	F	l	2	iso	m	opp	40	Marlene	2256	2	5.12	0.05515353	0.048894974	0.125171132
r19-026	15	m_l_2_ran	M	l	2	ran	m	same	40	Marlene	13958	3	10749	0.342998968	0.073720942	0.264142134
r19-026	16	m_l_2_iso	M	l	2	iso	m	same	40	Marlene	2247	2	3742	0.054791514	0.048768593	0.091246038
r19-026	17	post-playback					m		40	Marlene	3766	5	116293	0.012553291	0.016666611	0.387642041
r18-169	0	acclimation					m		32.6	Mila		0			0
r18-169	1	f_l_4_iso	F	l	4	iso	m	opp	32.6	Mila	29846	5	31048	0.388260853	0.065044035	0.403897439
r18-169	2	m_s_4_ran	M	s	4	ran	m	same	32.6	Mila	46092	3	30435	0.569677045	0.037078693	0.376163344
r18-169	3	f_s_2_ran	F	s	2	ran	m	opp	32.6	Mila	2483	1	34958	0.056353691	0.022695808	0.793400059
r18-169	4	f_s_4_ran	F	s	4	ran	m	opp	32.6	Mila	32801	5	4.23	0.413772659	0.063073178	0.053359908
r18-169	5	m_s_4_iso	M	s	4	iso	m	same	32.6	Mila		0			0
r18-169	6	f_l_2_ran	F	l	2	ran	m	opp	32.6	Mila	13153	3	2872	0.32856215	0.074940048	0.071742606
r18-169	7	f_l_4_ran	F	l	4	ran	m	opp	32.6	Mila	25583	4	15188	0.322834248	0.050476371	0.19165878
r18-169	8	m_l_2_ran	M	l	2	ran	m	same	32.6	Mila		0			0
r18-169	9	f_s_4_iso	F	s	4	iso	m	opp	32.6	Mila	39025	4	2954	0.486183784	0.049833059	0.036801714
r18-169	10	m_s_2_ran	M	s	2	ran	m	same	32.6	Mila		0			0
r18-169	11	f_l_2_iso	F	l	2	iso	m	opp	32.6	Mila		0			0
r18-169	12	m_l_4_ran	M	l	4	ran	m	same	32.6	Mila		0			0
r18-169	13	f_s_2_iso	F	s	2	iso	m	opp	32.6	Mila	0.495	1	32861	0.012351224	0.024951967	0.819946603
r18-169	14	m_s_2_iso	M	s	2	iso	m	same	32.6	Mila		0			0
r18-169	15	m_l_2_iso	M	l	2	iso	m	same	32.6	Mila		0			0
r18-169	16	m_l_4_iso	M	l	4	iso	m	same	32.6	Mila		0			0
r18-169	17	post-playback					m		32.6	Mila		0			0
r18-170	0	acclimation					f		34	Mila	22275	1	277724	0.074250248	0.003333344	0.925749752
r18-170	1	m_s_4_ran	M	s	4	ran	f	opp	34	Mila		0			0
r18-170	2	m_l_2_iso	M	l	2	iso	f	opp	34	Mila		0			0
r18-170	3	f_s_4_iso	F	s	4	iso	f	same	34	Mila		0			0
r18-170	4	f_l_2_iso	F	l	2	iso	f	same	34	Mila	9224	2	20967	0.225074423	0.048801913	0.511614855
r18-170	5	f_l_4_ran	F	l	4	ran	f	same	34	Mila		0			0
r18-170	6	m_s_2_ran	M	s	2	ran	f	opp	34	Mila		0			0
r18-170	7	m_l_4_ran	M	l	4	ran	f	opp	34	Mila		0			0
r18-170	8	f_l_2_ran	F	l	2	ran	f	same	34	Mila		0			0
r18-170	9	f_s_2_ran	F	s	2	ran	f	same	34	Mila		0			0
r18-170	10	f_s_2_iso	F	s	2	iso	f	same	34	Mila		0			0
r18-170	11	f_l_4_iso	F	l	4	iso	f	same	34	Mila		0			0
r18-170	12	m_s_2_iso	M	s	2	iso	f	opp	34	Mila	9132	2	11166	0.22522567	0.049326691	0.275390914
r18-170	13	f_s_4_ran	F	s	4	ran	f	same	34	Mila		0			0
r18-170	14	m_l_2_ran	M	l	2	ran	f	opp	34	Mila	8764	2	11131	0.215591252	0.049199282	0.273818602
r18-170	15	m_l_4_iso	M	l	4	iso	f	opp	34	Mila	2517	1	46.36	0.031253104	0.012416807	0.575643191
r18-170	16	m_s_4_iso	M	s	4	iso	f	opp	34	Mila		0			0
r18-170	17	post-playback					f		34	Mila		0			0
r18-174	0	acclimation					m		40.8	Mila		0			0
r18-174	1	m_s_4_iso	M	s	4	iso	m	same	40.8	Mila		0			0
r18-174	2	f_l_4_iso	F	l	4	iso	m	opp	40.8	Mila		0			0
r18-174	3	m_s_2_ran	M	s	2	ran	m	same	40.8	Mila		0			0
r18-174	4	m_s_4_ran	M	s	4	ran	m	same	40.8	Mila		0			0
r18-174	5	f_s_4_iso	F	s	4	iso	m	opp	40.8	Mila		0			0
r18-174	6	f_l_2_ran	F	l	2	ran	m	opp	40.8	Mila		0			0
r18-174	7	f_s_4_ran	F	s	4	ran	m	opp	40.8	Mila		0			0
r18-174	8	f_s_2_iso	F	s	2	iso	m	opp	40.8	Mila		0			0
r18-174	9	f_s_2_ran	F	s	2	ran	m	opp	40.8	Mila		0			0
r18-174	10	m_l_2_ran	M	l	2	ran	m	same	40.8	Mila		0			0
r18-174	11	f_l_4_ran	F	l	4	ran	m	opp	40.8	Mila		0			0
r18-174	12	m_l_2_iso	M	l	2	iso	m	same	40.8	Mila	0.542	1	19313	0.013276504	0.024495395	0.473079561
r18-174	13	m_s_2_iso	M	s	2	iso	m	same	40.8	Mila	1208	1	16.32	0.029777898	0.024650578	0.402297434
r18-174	14	f_l_2_iso	F	l	2	iso	m	opp	40.8	Mila	5492	2	9073	0.1328142	0.048366424	0.219414283
r18-174	15	m_l_4_ran	M	l	4	ran	m	same	40.8	Mila		0			0
r18-174	16	m_l_4_iso	M	l	4	iso	m	same	40.8	Mila	3267	2	12871	0.040255804	0.024643896	0.158595791
r18-174	17	post-playback					m		40.8	Mila		0			0
r18-176	0	acclimation					f		41.1	Mila		0			0
r18-176	1	f_s_4_ran	F	s	4	ran	f	same	41.1	Mila	17636	2	0.442	0.233741103	0.02650727	0.005858107
r18-176	2	m_s_4_iso	M	s	4	iso	f	opp	41.1	Mila	32141	1	38917	0.399267081	0.01242236	0.483440994
r18-176	3	m_l_4_iso	M	l	4	iso	f	opp	41.1	Mila	45824	5	21264	0.565742364	0.061729919	0.262525001
r18-176	4	f_s_2_ran	F	s	2	ran	f	same	41.1	Mila		0			0
r18-176	5	f_s_4_iso	F	s	4	iso	f	same	41.1	Mila	34473	1	46023	0.428257305	0.012422978	0.571742695
r18-176	6	f_l_4_iso	F	l	4	iso	f	same	41.1	Mila	50968	2	21812	0.629141362	0.024687701	0.269244063
r18-176	7	m_s_4_ran	M	s	4	ran	f	opp	41.1	Mila	19601	2	43.85	0.241957783	0.02468831	0.541291199
r18-176	8	m_l_2_iso	M	l	2	iso	f	opp	41.1	Mila	12632	2	0.777	0.313690432	0.049665996	0.01929524
r18-176	9	f_l_2_iso	F	l	2	iso	f	same	41.1	Mila	18087	3	19.25	0.439431487	0.072886297	0.467687075
r18-176	10	m_s_2_iso	M	s	2	iso	f	opp	41.1	Mila	26372	4	2743	0.651369575	0.098797145	0.067750142
r18-176	11	f_l_4_ran	F	l	4	ran	f	same	41.1	Mila	58131	3	5592	0.7337364	0.037866357	0.070582889
r18-176	12	f_l_2_ran	F	l	2	ran	f	same	41.1	Mila	25888	2	8.85	0.65117215	0.050306872	0.222607908
r18-176	13	m_s_2_ran	M	s	2	ran	f	opp	41.1	Mila		0			0
r18-176	14	m_l_2_ran	M	l	2	ran	f	opp	41.1	Mila	18248	1	22267	0.450401086	0.024682216	0.549598914
r18-176	15	m_l_4_ran	M	l	4	ran	f	opp	41.1	Mila	1485	1	73336	0.018880399	0.012714073	0.932399273
r18-176	16	f_s_2_iso	F	s	2	iso	f	same	41.1	Mila	20557	1	20074	0.505943738	0.02461175	0.494056262
r18-176	17	post-playback					f		41.1	Mila		0			0
r18-178	0	acclimation					m		35	Mila		0			0
r18-178	1	m_l_4_ran	M	l	4	ran	m	same	35	Mila	10766	4	1243	0.143519876	0.05332338	0.01657024
r18-178	2	f_s_4_ran	F	s	4	ran	m	opp	35	Mila	20503	7	8985	0.256945924	0.087724795	0.11260104
r18-178	3	m_s_4_iso	M	s	4	iso	m	same	35	Mila	1263	1	39471	0.01570876	0.012437656	0.49092673
r18-178	4	m_l_4_iso	M	l	4	iso	m	same	35	Mila	15819	3	0.825	0.195888799	0.037149403	0.010216086
r18-178	5	f_s_4_iso	F	s	4	iso	m	opp	35	Mila	10314	3	16924	0.128264438	0.037307864	0.2104661
r18-178	6	f_s_2_ran	F	s	2	ran	m	opp	35	Mila	2991	1	4299	0.068783921	0.022996964	0.09886395
r18-178	7	f_s_2_iso	F	s	2	iso	m	opp	35	Mila	13754	6	6917	0.340732299	0.148639945	0.171357083
r18-178	8	m_l_2_ran	M	l	2	ran	m	same	35	Mila	18148	7	8762	0.44906342	0.17321159	0.216811422
r18-178	9	f_l_4_ran	F	l	4	ran	m	opp	35	Mila	21205	9	10453	0.266645709	0.113171959	0.131442942
r18-178	10	f_l_2_iso	F	l	2	iso	m	opp	35	Mila	16.03	4	5199	0.390166728	0.097359134	0.126542534
r18-178	11	f_l_4_iso	F	l	4	iso	m	opp	35	Mila	24531	3	13569	0.302728518	0.037021954	0.167450298
r18-178	12	m_s_4_ran	M	s	4	ran	m	same	35	Mila		0			0
r18-178	13	f_l_2_ran	F	l	2	ran	m	opp	35	Mila	27227	3	5994	0.687950072	0.075801602	0.151451601
r18-178	14	m_s_2_iso	M	s	2	iso	m	same	35	Mila	0.502	1	27819	0.012243305	0.024389054	0.678479099
r18-178	15	m_l_2_iso	M	l	2	iso	m	same	35	Mila		0			0
r18-178	16	m_s_2_ran	M	s	2	ran	m	same	35	Mila	0.75	1	16.62	0.018383254	0.024511005	0.40737291
r18-178	17	post-playback					m		35	Mila		0			0
r18-185	0	acclimation					f		36	Mila		0			0
r18-185	1	f_s_4_iso	F	s	4	iso	f	same	36	Mila		0			0
r18-185	2	f_s_4_ran	F	s	4	ran	f	same	36	Mila		0			0
r18-185	3	f_l_4_iso	F	l	4	iso	f	same	36	Mila	14269	2	42.5	0.176197474	0.024696541	0.524801502
r18-185	4	m_s_4_iso	M	s	4	iso	f	opp	36	Mila	20.03	2	30462	0.248588272	0.024821595	0.37805771
r18-185	5	m_s_2_iso	M	s	2	iso	f	opp	36	Mila	24273	4	2737	0.598033902	0.098551296	0.067433724
r18-185	6	f_l_4_ran	F	l	4	ran	f	same	36	Mila	22315	5	2811	0.27991721	0.062719518	0.035260913
r18-185	7	f_l_2_iso	F	l	2	iso	f	same	36	Mila	22896	4	5809	0.559380421	0.09772544	0.141921771
r18-185	8	m_l_4_iso	M	l	4	iso	f	opp	36	Mila	35403	2	37839	0.437095659	0.024692577	0.467171218
r18-185	9	m_l_2_ran	M	l	2	ran	f	opp	36	Mila	5123	1	18.31	0.12681007	0.024753088	0.45322904
r18-185	10	m_s_4_ran	M	s	4	ran	f	opp	36	Mila	25884	2	6.73	0.321021952	0.024804663	0.083467692
r18-185	11	m_l_4_ran	M	l	4	ran	f	opp	36	Mila	12682	3	14259	0.161519161	0.038208286	0.181603984
r18-185	12	f_s_2_iso	F	s	2	iso	f	same	36	Mila		0			0
r18-185	13	m_s_2_ran	M	s	2	ran	f	opp	36	Mila	6385	2	17871	0.156207951	0.048929664	0.437211009
r18-185	14	f_s_2_ran	F	s	2	ran	f	same	36	Mila		0			0
r18-185	15	f_l_2_ran	F	l	2	ran	f	same	36	Mila	5139	1	26679	0.129325314	0.025165463	0.671389385
r18-185	16	m_l_2_iso	M	l	2	iso	f	opp	36	Mila		0			0
r18-185	17	post-playback					f		36	Mila		0			0
r18-188	0	acclimation					f		39.9	Mila		0			0
r18-188	1	f_l_4_ran	F	l	4	ran	f	same	39.9	Mila		0			0
r18-188	2	f_l_4_iso	F	l	4	iso	f	same	39.9	Mila		0			0
r18-188	3	m_s_2_iso	M	s	2	iso	f	opp	39.9	Mila		0			0
r18-188	4	f_l_2_iso	F	l	2	iso	f	same	39.9	Mila	3103	3	7471	0.074731468	0.072250855	0.179928712
r18-188	5	f_s_2_iso	F	s	2	iso	f	same	39.9	Mila		0			0
r18-188	6	m_l_4_iso	M	l	4	iso	f	opp	39.9	Mila		0			0
r18-188	7	f_l_2_ran	F	l	2	ran	f	same	39.9	Mila	5081	3	15261	0.128052622	0.075606744	0.384611507
r18-188	8	m_s_2_ran	M	s	2	ran	f	opp	39.9	Mila	2.34	1	22469	0.057383883	0.024523027	0.551007896
r18-188	9	m_s_4_ran	M	s	4	ran	f	opp	39.9	Mila		0			0
r18-188	10	m_s_4_iso	M	s	4	iso	f	opp	39.9	Mila	3066	2	20798	0.038020362	0.02480128	0.257908508
r18-188	11	m_l_4_ran	M	l	4	ran	f	opp	39.9	Mila	4.5	1	42323	0.057325571	0.012739016	0.539153365
r18-188	12	f_s_2_ran	F	s	2	ran	f	same	39.9	Mila	15291	2	22289	0.349556511	0.045720556	0.509532736
r18-188	13	f_s_4_ran	F	s	4	ran	f	same	39.9	Mila	15989	2	37618	0.202100766	0.025279976	0.475491064
r18-188	14	f_s_4_iso	F	s	4	iso	f	same	39.9	Mila	8.37	4	9989	0.103587827	0.049504338	0.123624708
r18-188	15	m_l_2_ran	M	l	2	ran	f	opp	39.9	Mila	6821	3	11812	0.168100155	0.073933509	0.29110087
r18-188	16	m_l_2_iso	M	l	2	iso	f	opp	39.9	Mila	9126	6	9489	0.221113076	0.145373489	0.229908172
r18-188	17	post-playback					f		39.9	Mila		0			0
r18-189	0	acclimation					m		39.1	Mila		0			0
r18-189	1	f_s_4_iso	F	s	4	iso	m	opp	39.1	Mila		0			0
r18-189	2	f_l_4_ran	F	l	4	ran	m	opp	39.1	Mila	58047	2	17214	0.734660558	0.025312611	0.217865641
r18-189	3	m_l_2_ran	M	l	2	ran	m	same	39.1	Mila	2388	1	38116	0.05895714	0.02468892	0.94104286
r18-189	4	f_s_2_iso	F	s	2	iso	m	opp	39.1	Mila	10007	1	29469	0.245546449	0.024537469	0.723094666
r18-189	5	f_l_2_iso	F	l	2	iso	m	opp	39.1	Mila	14511	2	10731	0.353823271	0.048766215	0.261655125
r18-189	6	f_s_4_ran	F	s	4	ran	m	opp	39.1	Mila		0			0
r18-189	7	f_l_2_ran	F	l	2	ran	m	opp	39.1	Mila	8.64	1	31038	0.217331153	0.025154069	0.780731983
r18-189	8	f_l_4_iso	F	l	4	iso	m	opp	39.1	Mila		0			0
r18-189	9	m_s_2_iso	M	s	2	iso	m	same	39.1	Mila	9291	2	20.9	0.230803627	0.049683269	0.519190163
r18-189	10	m_s_4_iso	M	s	4	iso	m	same	39.1	Mila	19.98	4	41284	0.248637348	0.049777247	0.513750964
r18-189	11	m_s_4_ran	M	s	4	ran	m	same	39.1	Mila	21682	3	18807	0.267705452	0.037040695	0.232208119
r18-189	12	f_s_2_ran	F	s	2	ran	m	opp	39.1	Mila	19795	1	23957	0.45243646	0.022856098	0.54756354
r18-189	13	m_l_2_iso	M	l	2	iso	m	same	39.1	Mila	24947	4	6635	0.612121212	0.098147467	0.16280211
r18-189	14	m_s_2_ran	M	s	2	ran	m	same	39.1	Mila	20199	3	0.463	0.493754431	0.073333496	0.011317803
r18-189	15	m_l_4_iso	M	l	4	iso	m	same	39.1	Mila	49839	4	12978	0.615227938	0.04937723	0.160204422
r18-189	16	m_l_4_ran	M	l	4	ran	m	same	39.1	Mila	1256	1	2695	0.016020817	0.012755427	0.034375877
r18-189	17	post-playback					m		39.1	Mila		0			0
r18-192	0	acclimation					m		44.2	Mila		0			0
r18-192	1	f_l_4_ran	F	l	4	ran	m	opp	44.2	Mila		0			0
r18-192	2	f_l_4_iso	F	l	4	iso	m	opp	44.2	Mila	41737	3	13189	0.516655732	0.037136526	0.163264548
r18-192	3	m_l_2_ran	M	l	2	ran	m	same	44.2	Mila	24246	1	15667	0.604020827	0.024912185	0.390299195
r18-192	4	m_l_2_iso	M	l	2	iso	m	same	44.2	Mila	2508	1	28371	0.062296629	0.024839166	0.70471199
r18-192	5	f_s_4_iso	F	s	4	iso	m	opp	44.2	Mila		0			0
r18-192	6	f_s_2_iso	F	s	2	iso	m	opp	44.2	Mila		0			0
r18-192	7	f_l_2_iso	F	l	2	iso	m	opp	44.2	Mila	3.5	1	18988	0.085605968	0.024458848	0.464424606
r18-192	8	m_s_2_iso	M	s	2	iso	m	same	44.2	Mila		0			0
r18-192	9	m_s_2_ran	M	s	2	ran	m	same	44.2	Mila		0			0
r18-192	10	m_l_4_ran	M	l	4	ran	m	same	44.2	Mila		0			0
r18-192	11	m_s_4_ran	M	s	4	ran	m	same	44.2	Mila		0			0
r18-192	12	f_l_2_ran	F	l	2	ran	m	opp	44.2	Mila	12471	2	7254	0.315386172	0.050579131	0.183450508
r18-192	13	f_s_4_ran	F	s	4	ran	m	opp	44.2	Mila		0			0
r18-192	14	m_s_4_iso	M	s	4	iso	m	same	44.2	Mila		0			0
r18-192	15	m_l_4_iso	M	l	4	iso	m	same	44.2	Mila	9511	1	62357	0.11758379	0.012362926	0.77091498
r18-192	16	f_s_2_ran	F	s	2	ran	m	opp	44.2	Mila	15246	2	24994	0.347780464	0.045622519	0.570144623
r18-192	17	post-playback					m		44.2	Mila		0			0
r18-194	0	acclimation					f		37.3	Mila		0			0
r18-194	1	m_l_2_ran	M	l	2	ran	f	opp	37.3	Mila	33633	1	7042	0.826871543	0.024585126	0.173128457
r18-194	2	m_s_4_ran	M	s	4	ran	f	opp	37.3	Mila		0			0
r18-194	3	f_l_2_iso	F	l	2	iso	f	same	37.3	Mila		0			0
r18-194	4	f_s_2_ran	F	s	2	ran	f	same	37.3	Mila		0			0
r18-194	5	m_l_4_ran	M	l	4	ran	f	opp	37.3	Mila	38.74	1	39517	0.495035588	0.01277841	0.504964412
r18-194	6	f_l_4_iso	F	l	4	iso	f	same	37.3	Mila	18086	2	57147	0.223250876	0.024687701	0.705414013
r18-194	7	m_s_2_ran	M	s	2	ran	f	opp	37.3	Mila	24199	2	14304	0.597506173	0.049382716	0.353185185
r18-194	8	m_s_2_iso	M	s	2	iso	f	opp	37.3	Mila	13643	2	24917	0.334723619	0.049068917	0.611325106
r18-194	9	m_l_2_iso	M	l	2	iso	f	opp	37.3	Mila	3953	1	36839	0.096906256	0.024514611	0.903093744
r18-194	10	f_l_4_ran	F	l	4	ran	f	same	37.3	Mila	28746	2	42439	0.362364331	0.025211461	0.534974599
r18-194	11	f_s_2_iso	F	s	2	iso	f	same	37.3	Mila	11997	4	12733	0.2943399	0.098137835	0.312397262
r18-194	12	f_s_4_iso	F	s	4	iso	f	same	37.3	Mila	29495	2	27.26	0.367580165	0.024924914	0.339726574
r18-194	13	f_s_4_ran	F	s	4	ran	f	same	37.3	Mila	56001	2	16901	0.704698747	0.025167363	0.212676801
r18-194	14	m_s_4_iso	M	s	4	iso	f	opp	37.3	Mila	16.5	1	29.19	0.205264729	0.012440287	0.363131967
r18-194	15	f_l_2_ran	F	l	2	ran	f	same	37.3	Mila		0			0
r18-194	16	m_l_4_iso	M	l	4	iso	f	opp	37.3	Mila	59156	2	19592	0.730330004	0.024691663	0.241879529
r18-194	17	post-playback					f		37.3	Mila		0			0
r18-204	0	acclimation					f		40.9	Mila		0			0
r18-204	1	m_l_2_ran	M	l	2	ran	f	opp	40.9	Mila		0			0
r18-204	2	m_l_4_iso	M	l	4	iso	f	opp	40.9	Mila	2947	1	41206	0.036555112	0.012404178	0.511126547
r18-204	3	f_l_2_ran	F	l	2	ran	f	same	40.9	Mila	6753	3	19162	0.169417963	0.075263422	0.480732564
r18-204	4	f_l_2_iso	F	l	2	iso	f	same	40.9	Mila	16478	3	6276	0.406874244	0.074075903	0.154966789
r18-204	5	m_s_2_iso	M	s	2	iso	f	opp	40.9	Mila	2511	1	34354	0.061987756	0.024686482	0.848079392
r18-204	6	m_l_4_ran	M	l	4	ran	f	opp	40.9	Mila	0.998	1	61444	0.012752364	0.01277792	0.785126501
r18-204	7	f_l_4_ran	F	l	4	ran	f	same	40.9	Mila	11247	4	4341	0.14167307	0.050386083	0.054681497
r18-204	8	m_s_4_iso	M	s	4	iso	f	opp	40.9	Mila	10892	1	69703	0.13514486	0.012407718	0.86485514
r18-204	9	f_s_2_ran	F	s	2	ran	f	same	40.9	Mila	9041	2	29012	0.208789432	0.046187243	0.669992148
r18-204	10	m_l_2_iso	M	l	2	iso	f	opp	40.9	Mila	18341	2	20661	0.447210573	0.048766215	0.503779382
r18-204	11	f_l_4_iso	F	l	4	iso	f	same	40.9	Mila	12165	2	14076	0.149734134	0.024617203	0.173255871
r18-204	12	m_s_4_ran	M	s	4	ran	f	opp	40.9	Mila	1249	1	79.48	0.015471516	0.012387122	0.984528484
r18-204	13	f_s_4_ran	F	s	4	ran	f	same	40.9	Mila	23994	3	46345	0.301818914	0.037736798	0.582970641
r18-204	14	f_s_4_iso	F	s	4	iso	f	same	40.9	Mila	6253	2	39042	0.078069792	0.024970348	0.487446158
r18-204	15	f_s_2_iso	F	s	2	iso	f	same	40.9	Mila	17265	3	4616	0.428880167	0.074523052	0.114666137
r18-204	16	m_s_2_ran	M	s	2	ran	f	opp	40.9	Mila	22857	2	11.28	0.56237083	0.049207755	0.277531739
r18-204	17	post-playback					f		40.9	Mila		0			0
r18-216	0	acclimation					m		39.5	Mila	17757	1	282243	0.05919	0.003333333	0.94081
r18-216	1	f_s_2_ran	F	s	2	ran	m	opp	39.5	Mila		0			0
r18-216	2	f_l_4_ran	F	l	4	ran	m	opp	39.5	Mila		0			0
r18-216	3	f_s_2_iso	F	s	2	iso	m	opp	39.5	Mila		0			0
r18-216	4	m_l_4_ran	M	l	4	ran	m	same	39.5	Mila		0			0
r18-216	5	f_s_4_ran	F	s	4	ran	m	opp	39.5	Mila		0			0
r18-216	6	m_s_4_ran	M	s	4	ran	m	same	39.5	Mila	3799	1	46354	0.047024893	0.012378229	0.573780435
r18-216	7	m_l_2_ran	M	l	2	ran	m	same	39.5	Mila	15061	2	4742	0.375735954	0.04989522	0.118301567
r18-216	8	m_l_2_iso	M	l	2	iso	m	same	39.5	Mila		0			0
r18-216	9	m_l_4_iso	M	l	4	iso	m	same	39.5	Mila	10522	1	34658	0.130677231	0.012419429	0.430432569
r18-216	10	f_l_4_iso	F	l	4	iso	m	opp	39.5	Mila		0			0
r18-216	11	f_s_4_iso	F	s	4	iso	m	opp	39.5	Mila	0.998	1	79007	0.012376606	0.012401409	0.979798105
r18-216	12	f_l_2_iso	F	l	2	iso	m	opp	39.5	Mila	15.86	1	19.41	0.386132346	0.024346302	0.472561718
r18-216	13	m_s_4_iso	M	s	4	iso	m	same	39.5	Mila	3957	1	33547	0.04916383	0.012424521	0.416805407
r18-216	14	m_s_2_ran	M	s	2	ran	m	same	39.5	Mila		0			0
r18-216	15	f_l_2_ran	F	l	2	ran	m	opp	39.5	Mila		0			0
r18-216	16	m_s_2_iso	M	s	2	iso	m	same	39.5	Mila		0			0
r18-216	17	post-playback					m		39.5	Mila		0			0
r18-227	0	acclimation					m		38.6	Mila		0			0
r18-227	1	f_s_4_ran	F	s	4	ran	m	opp	38.6	Mila		0			0
r18-227	2	f_l_2_iso	F	l	2	iso	m	opp	38.6	Mila	3994	1	25738	0.0972486	0.024348673	0.626686146
r18-227	3	f_s_4_iso	F	s	4	iso	m	opp	38.6	Mila	14.49	3	16391	0.179912837	0.037249035	0.203516309
r18-227	4	m_l_2_ran	M	l	2	ran	m	same	38.6	Mila	21419	3	1034	0.528342378	0.074000987	0.025505673
r18-227	5	f_l_4_ran	F	l	4	ran	m	opp	38.6	Mila		0			0
r18-227	6	m_s_4_iso	M	s	4	iso	m	same	38.6	Mila	16.24	3	59562	0.202015176	0.037318074	0.740913049
r18-227	7	f_s_2_iso	F	s	2	iso	m	opp	38.6	Mila	21099	2	4877	0.521143111	0.049399793	0.120461394
r18-227	8	m_l_4_ran	M	l	4	ran	m	same	38.6	Mila		0			0
r18-227	9	f_l_2_ran	F	l	2	ran	m	opp	38.6	Mila	18213	3	1.14	0.458200206	0.075473597	0.028679967
r18-227	10	m_l_4_iso	M	l	4	iso	m	same	38.6	Mila	1042	1	54626	0.012866262	0.012347661	0.674503315
r18-227	11	m_s_4_ran	M	s	4	ran	m	same	38.6	Mila	8719	4	5.36	0.107841682	0.049474335	0.066295609
r18-227	12	m_s_2_iso	M	s	2	iso	m	same	38.6	Mila	31097	2	6081	0.77014711	0.049531923	0.150601813
r18-227	13	f_l_4_iso	F	l	4	iso	m	opp	38.6	Mila	49489	6	0.013	0.611458436	0.074132648	0.000160621
r18-227	14	m_s_2_ran	M	s	2	ran	m	same	38.6	Mila	5962	2	33632	0.14589145	0.048940439	0.82298243
r18-227	15	m_l_2_iso	M	l	2	iso	m	same	38.6	Mila	0.616	1	40408	0.015015601	0.024375975	0.984984399
r18-227	16	f_s_2_ran	F	s	2	ran	m	opp	38.6	Mila		0			0
r18-227	17	post-playback					m		38.6	Mila		0			0
r18-228	0	acclimation					m		?	Mila		0			0
r18-228	1	f_s_4_iso	F	s	4	iso	m	opp	?	Mila		0			0
r18-228	2	f_l_4_iso	F	l	4	iso	m	opp	?	Mila	0.999	1	13015	0.012297201	0.01230951	0.160208277
r18-228	3	m_s_2_iso	M	s	2	iso	m	same	?	Mila	1373	1	38927	0.034069479	0.024813896	0.965930521
r18-228	4	m_s_4_iso	M	s	4	iso	m	same	?	Mila		0			0
r18-228	5	m_l_2_ran	M	l	2	ran	m	same	?	Mila		0			0
r18-228	6	m_s_4_ran	M	s	4	ran	m	same	?	Mila	3701	1	66625	0.045798787	0.012374706	0.824464794
r18-228	7	f_s_2_ran	F	s	2	ran	m	opp	?	Mila		0			0
r18-228	8	f_l_4_ran	F	l	4	ran	m	opp	?	Mila	12854	4	5.65	0.161527055	0.050265149	0.070999522
r18-228	9	m_l_4_iso	M	l	4	iso	m	same	?	Mila	63.67	2	0.515	0.790381846	0.024827449	0.006393068
r18-228	10	f_l_2_ran	F	l	2	ran	m	opp	?	Mila	33339	2	1252	0.839160311	0.050341061	0.031513504
r18-228	11	m_l_2_iso	M	l	2	iso	m	same	?	Mila	25484	2	6919	0.622046475	0.04881859	0.168887913
r18-228	12	f_l_2_iso	F	l	2	iso	m	opp	?	Mila	23399	2	0.853	0.570290032	0.048744821	0.020789666
r18-228	13	f_s_4_ran	F	s	4	ran	m	opp	?	Mila	41485	1	37844	0.522948732	0.012605731	0.477051268
r18-228	14	m_s_2_ran	M	s	2	ran	m	same	?	Mila		0			0
r18-228	15	f_s_2_iso	F	s	2	iso	m	opp	?	Mila		0			0
r18-228	16	m_l_4_ran	M	l	4	ran	m	same	?	Mila		0			0
r18-228	17	post-playback					m		?	Mila		0			0
r18-231	0	acclimation					m		36.1	Mila		0			0
r18-231	1	m_l_4_ran	M	l	4	ran	m	same	36.1	Mila	77.84	1	0.135	0.998268676	0.012824623	0.001731324
r18-231	2	m_l_4_iso	M	l	4	iso	m	same	36.1	Mila		0			0
r18-231	3	f_l_4_ran	F	l	4	ran	m	opp	36.1	Mila	6749	2	61702	0.085407676	0.025309728	0.780830412
r18-231	4	f_s_4_iso	F	s	4	iso	m	opp	36.1	Mila	18184	2	2188	0.226603195	0.024923361	0.027266157
r18-231	5	m_l_2_ran	M	l	2	ran	m	same	36.1	Mila	17168	4	12179	0.422961321	0.09854644	0.300049273
r18-231	6	f_s_4_ran	F	s	4	ran	m	opp	36.1	Mila		0			0
r18-231	7	m_s_4_ran	M	s	4	ran	m	same	36.1	Mila	16655	3	34074	0.206773685	0.037245335	0.423032515
r18-231	8	m_s_2_ran	M	s	2	ran	m	same	36.1	Mila	2045	1	38636	0.050269167	0.0245815	0.949730833
r18-231	9	m_s_4_iso	M	s	4	iso	m	same	36.1	Mila	53.4	3	5039	0.666134424	0.037423282	0.06285864
r18-231	10	f_l_2_iso	F	l	2	iso	m	opp	36.1	Mila	15437	5	7772	0.376889084	0.122073293	0.189750726
r18-231	11	f_s_2_iso	F	s	2	iso	m	opp	36.1	Mila	9813	2	29717	0.243353834	0.049598254	0.736955659
r18-231	12	m_s_2_iso	M	s	2	iso	m	same	36.1	Mila	20364	2	12265	0.505674058	0.04966353	0.304561595
r18-231	13	f_l_4_iso	F	l	4	iso	m	opp	36.1	Mila	24.52	3	13211	0.304086315	0.037204688	0.163837043
r18-231	14	f_l_2_ran	F	l	2	ran	m	opp	36.1	Mila	27621	1	11704	0.702377622	0.025429116	0.297622378
r18-231	15	m_l_2_iso	M	l	2	iso	m	same	36.1	Mila	4269	1	36461	0.104812178	0.024551927	0.895187822
r18-231	16	f_s_2_ran	F	s	2	ran	m	opp	36.1	Mila	4524	1	36683	0.104422491	0.023081895	0.846713138
r18-231	17	post-playback					m		36.1	Mila		0			0
r18-235	0	acclimation					f		32.1	Mila		0			0
r18-235	1	m_s_2_ran	M	s	2	ran	f	opp	32.1	Mila	16517	4	6964	0.408139564	0.098841088	0.172082335
r18-235	2	m_s_4_iso	M	s	4	iso	f	opp	32.1	Mila	21944	6	4.14	0.272809777	0.074592538	0.051468851
r18-235	3	m_l_2_iso	M	l	2	iso	f	opp	32.1	Mila	8428	4	11702	0.204245832	0.096936797	0.2835886
r18-235	4	m_s_4_ran	M	s	4	ran	f	opp	32.1	Mila	12275	7	1258	0.151075064	0.086152786	0.015482886
r18-235	5	f_l_4_iso	F	l	4	iso	f	same	32.1	Mila	25163	10	11639	0.311577514	0.123823675	0.144118375
r18-235	6	f_s_2_ran	F	s	2	ran	f	same	32.1	Mila	8.97	7	1992	0.204593664	0.159660607	0.045434847
r18-235	7	f_s_4_iso	F	s	4	iso	f	same	32.1	Mila	27.05	11	5497	0.336509753	0.136843153	0.068384256
r18-235	8	f_l_2_iso	F	l	2	iso	f	same	32.1	Mila	14.25	12	1265	0.347586409	0.292704344	0.030855916
r18-235	9	f_l_2_ran	F	l	2	ran	f	same	32.1	Mila	9209	9	8053	0.229690968	0.224478088	0.200858005
r18-235	10	f_s_2_iso	F	s	2	iso	f	same	32.1	Mila	2763	3	4181	0.068644257	0.07453231	0.103873196
r18-235	11	f_s_4_ran	F	s	4	ran	f	same	32.1	Mila	3462	4	5955	0.043546074	0.0503132	0.074903776
r18-235	12	m_l_4_ran	M	l	4	ran	f	opp	32.1	Mila	19.72	17	5421	0.241972097	0.208596635	0.066517786
r18-235	13	m_s_2_iso	M	s	2	iso	f	opp	32.1	Mila	11538	4	2.73	0.284348276	0.098578012	0.067279493
r18-235	14	m_l_2_ran	M	l	2	ran	f	opp	32.1	Mila	16045	11	3315	0.394944124	0.270762566	0.081597991
r18-235	15	f_l_4_ran	F	l	4	ran	f	same	32.1	Mila	21012	13	0.69	0.264092606	0.163392532	0.008672373
r18-235	16	post-playback					f		32.1	Mila		0			0
r18-256	0	acclimation					f		36.7	Mila		0			0
r18-256	1	m_l_2_ran	M	l	2	ran	f	opp	36.7	Mila	31366	3	0.636	0.77669374	0.074286846	0.015748811
r18-256	2	m_l_4_ran	M	l	4	ran	f	opp	36.7	Mila	4.82	2	37163	0.063423556	0.026316828	0.489006145
r18-256	3	f_s_2_iso	F	s	2	iso	f	same	36.7	Mila	24424	2	10885	0.606340458	0.0496512	0.270226658
r18-256	4	m_s_2_ran	M	s	2	ran	f	opp	36.7	Mila	14664	3	1226	0.360800138	0.073813449	0.030165096
r18-256	5	m_l_2_iso	M	l	2	iso	f	opp	36.7	Mila	29297	6	4399	0.714456421	0.146320051	0.107276984
r18-256	6	f_s_2_ran	F	s	2	ran	f	same	36.7	Mila	17589	1	23014	0.401924044	0.022850875	0.525890042
r18-256	7	f_s_4_ran	F	s	4	ran	f	same	36.7	Mila	3501	1	26198	0.046588066	0.013307074	0.348618726
r18-256	8	m_s_4_ran	M	s	4	ran	f	opp	36.7	Mila	22182	1	58603	0.274580677	0.012378536	0.725419323
r18-256	9	f_l_4_ran	F	l	4	ran	f	same	36.7	Mila	6754	1	60752	0.084959181	0.012579091	0.764204939
r18-256	10	m_l_4_iso	M	l	4	iso	f	opp	36.7	Mila	15475	2	49891	0.192245577	0.024845955	0.619794772
r18-256	11	f_l_2_iso	F	l	2	iso	f	same	36.7	Mila	14762	2	15483	0.36228434	0.049083368	0.379978894
r18-256	12	f_l_2_ran	F	l	2	ran	f	same	36.7	Mila	11952	1	27775	0.300853324	0.025171798	0.699146676
r18-256	13	f_s_4_iso	F	s	4	iso	f	same	36.7	Mila		0			0
r18-256	14	m_s_4_iso	M	s	4	iso	f	opp	36.7	Mila	18832	2	12853	0.233077961	0.024753394	0.159077689
r18-256	15	m_s_2_iso	M	s	2	iso	f	opp	36.7	Mila	13591	3	20722	0.337605882	0.074521201	0.514742778
r18-256	16	f_l_4_iso	F	l	4	iso	f	same	36.7	Mila	27155	3	14004	0.337115616	0.037243485	0.17385259
r18-256	17	post-playback					f		36.7	Mila		0			0
r18-258	0	acclimation					f		37.4	Mila		0			0
r18-258	1	f_l_2_iso	F	l	2	iso	f	same	37.4	Mila	206979	4	12141	0.835006878	0.016137036	0.048979938
r18-258	2	m_l_4_ran	M	l	4	ran	f	opp	37.4	Mila	78006	1	0.146	0.998131846	0.012795578	0.001868154
r18-258	3	m_l_2_iso	M	l	2	iso	f	opp	37.4	Mila	39923	1	0.352	0.984537608	0.024660912	0.008680641
r18-258	4	m_l_4_iso	M	l	4	iso	f	opp	37.4	Mila	68965	2	0.425	0.854034575	0.024767188	0.005263028
r18-258	5	m_l_2_ran	M	l	2	ran	f	opp	37.4	Mila	23579	2	12721	0.578398666	0.049060492	0.312049257
r18-258	6	m_s_4_ran	M	s	4	ran	f	opp	37.4	Mila	2239	1	78266	0.027811937	0.012421589	0.972188063
r18-258	7	f_l_4_iso	F	l	4	iso	f	same	37.4	Mila	29058	1	52.01	0.358439828	0.012335323	0.641560172
r18-258	8	f_s_2_ran	F	s	2	ran	f	same	37.4	Mila		0			0
r18-258	9	f_s_4_iso	F	s	4	iso	f	same	37.4	Mila		0			0
r18-258	10	m_s_4_iso	M	s	4	iso	f	opp	37.4	Mila		0			0
r18-258	11	f_l_4_ran	F	l	4	ran	f	same	37.4	Mila	58126	3	17385	0.735688339	0.037970358	0.220038223
r18-258	12	m_s_2_ran	M	s	2	ran	f	opp	37.4	Mila	17001	1	19312	0.417889536	0.024580292	0.47469459
r18-258	13	f_s_2_iso	F	s	2	iso	f	same	37.4	Mila	22397	4	8.74	0.553600119	0.098870406	0.216031836
r18-258	14	f_s_4_ran	F	s	4	ran	f	same	37.4	Mila		0			0
r18-258	15	f_l_2_ran	F	l	2	ran	f	same	37.4	Mila	8188	1	31811	0.204705118	0.025000625	0.795294882
r18-258	16	m_s_2_iso	M	s	2	iso	f	opp	37.4	Mila		0			0
r18-258	17	post-playback					f		37.4	Mila		0			0
r18-265	0	acclimation					f		34.7	Mila		0			0
r18-265	1	m_s_4_ran	M	s	4	ran	f	opp	34.7	Mila	62537	4	0.631	0.773159424	0.049452927	0.007801199
r18-265	2	f_l_4_ran	F	l	4	ran	f	same	34.7	Mila		0			0
r18-265	3	m_s_4_iso	M	s	4	iso	f	opp	34.7	Mila	13586	3	1102	0.168917071	0.037299515	0.013701355
r18-265	4	m_l_2_ran	M	l	2	ran	f	opp	34.7	Mila		0			0
r18-265	5	f_l_4_iso	F	l	4	iso	f	same	34.7	Mila	45901	4	11053	0.566720992	0.049386374	0.136466899
r18-265	6	f_s_2_iso	F	s	2	iso	f	same	34.7	Mila		0			0
r18-265	7	m_s_2_iso	M	s	2	iso	f	opp	34.7	Mila	1392	1	14722	0.034536658	0.024810818	0.365264855
r18-265	8	m_l_4_iso	M	l	4	iso	f	opp	34.7	Mila	30626	2	33.14	0.38048029	0.024846881	0.41171282
r18-265	9	f_s_4_iso	F	s	4	iso	f	same	34.7	Mila	17286	2	12729	0.214719583	0.024843177	0.158114403
r18-265	10	m_l_4_ran	M	l	4	ran	f	opp	34.7	Mila		0			0
r18-265	11	f_l_2_ran	F	l	2	ran	f	same	34.7	Mila	10217	4	2527	0.256412187	0.100386488	0.063419164
r18-265	12	m_s_2_ran	M	s	2	ran	f	opp	34.7	Mila	17.72	3	4467	0.435263197	0.073690157	0.109724644
r18-265	13	f_s_2_ran	F	s	2	ran	f	same	34.7	Mila	7016	1	31491	0.161283649	0.022987977	0.723914393
r18-265	14	f_l_2_iso	F	l	2	iso	f	same	34.7	Mila	6008	1	27508	0.145669673	0.024245951	0.666957618
r18-265	15	m_l_2_iso	M	l	2	iso	f	opp	34.7	Mila	7768	1	33157	0.189810629	0.024434942	0.810189371
r18-265	16	f_s_4_ran	F	s	4	ran	f	same	34.7	Mila	3.51	1	55059	0.044299165	0.012620845	0.694891082
r18-265	17	post-playback					f		34.7	Mila		0			0
r19-003	0	acclimation					f		34.5	Mila		0			0
r19-003	1	m_s_4_iso	M	s	4	iso	f	opp	34.5	Mila	14541	5	0	0.180331122	0.062007813	0
r19-003	2	m_s_4_ran	M	s	4	ran	f	opp	34.5	Mila	48148	16	0.876	0.59425835	0.197477228	0.010811878
r19-003	3	m_l_2_ran	M	l	2	ran	f	opp	34.5	Mila	23344	4	2.77	0.578337132	0.099098206	0.068625508
r19-003	4	m_l_4_ran	M	l	4	ran	f	opp	34.5	Mila	35679	10	6619	0.455495979	0.127665007	0.084501468
r19-003	5	m_s_2_ran	M	s	2	ran	f	opp	34.5	Mila	26306	7	0.603	0.641484588	0.1706984	0.014704448
r19-003	6	f_l_4_iso	F	l	4	iso	f	same	34.5	Mila	47176	14	0.552	0.582419753	0.172839506	0.006814815
r19-003	7	f_l_2_ran	F	l	2	ran	f	same	34.5	Mila	24134	7	6.53	0.61277136	0.177732639	0.165799162
r19-003	8	f_l_4_ran	F	l	4	ran	f	same	34.5	Mila	49.8	16	0.711	0.626943462	0.201427618	0.00895094
r19-003	9	m_l_4_iso	M	l	4	iso	f	opp	34.5	Mila	41817	11	1688	0.516112709	0.135763919	0.02083359
r19-003	10	m_l_2_iso	M	l	2	iso	f	opp	34.5	Mila	23253	7	2371	0.568741592	0.171211936	0.057991929
r19-003	11	f_s_2_iso	F	s	2	iso	f	same	34.5	Mila	4108	2	0.531	0.10142709	0.049380278	0.013110464
r19-003	12	f_s_4_ran	F	s	4	ran	f	same	34.5	Mila	31124	8	0.845	0.391975114	0.100751861	0.010641915
r19-003	13	m_s_2_iso	M	s	2	iso	f	opp	34.5	Mila	24.44	6	1654	0.602757294	0.147976422	0.040792167
r19-003	14	f_s_2_ran	F	s	2	ran	f	same	34.5	Mila	14.53	2	2978	0.3330201	0.045838968	0.068254223
r19-003	15	f_s_4_iso	F	s	4	iso	f	same	34.5	Mila	20443	6	11213	0.253896693	0.074518425	0.139262516
r19-003	16	f_l_2_iso	F	l	2	iso	f	same	34.5	Mila	24314	9	1082	0.587053625	0.217302074	0.026124538
r19-003	17	post-playback					f		34.5	Mila		0			0
r19-011	0	acclimation					f		35.5	Mila		0			0
r19-011	1	m_l_4_iso	M	l	4	iso	f	opp	35.5	Mila	4578	1	76799	0.056256682	0.012288484	0.943743318
r19-011	2	f_s_2_iso	F	s	2	iso	f	same	35.5	Mila	4984	3	30.1	0.124746577	0.075088229	0.753385228
r19-011	3	f_s_2_ran	F	s	2	ran	f	same	35.5	Mila	34044	4	2057	0.77797075	0.091407678	0.047006399
r19-011	4	f_l_2_ran	F	l	2	ran	f	same	35.5	Mila	22.1	5	0.556	0.554635346	0.12548311	0.013953722
r19-011	5	m_l_4_ran	M	l	4	ran	f	opp	35.5	Mila	59473	1	19008	0.757801251	0.012741938	0.242198749
r19-011	6	f_l_2_iso	F	l	2	iso	f	same	35.5	Mila	13412	2	26696	0.329217703	0.049093007	0.655293453
r19-011	7	m_s_4_iso	M	s	4	iso	f	opp	35.5	Mila		0			0
r19-011	8	m_s_4_ran	M	s	4	ran	f	opp	35.5	Mila		0			0
r19-011	9	f_l_4_iso	F	l	4	iso	f	same	35.5	Mila	49505	3	26866	0.61282975	0.037137446	0.332578205
r19-011	10	m_s_2_ran	M	s	2	ran	f	opp	35.5	Mila	20604	7	6506	0.501948938	0.17053206	0.158497369
r19-011	11	f_s_4_iso	F	s	4	iso	f	same	35.5	Mila	6864	3	29062	0.085041009	0.037168273	0.360061452
r19-011	12	m_l_2_iso	M	l	2	iso	f	opp	35.5	Mila	24836	6	0.425	0.607980416	0.146878825	0.010403917
r19-011	13	f_s_4_ran	F	s	4	ran	f	same	35.5	Mila		0			0
r19-011	14	m_s_2_iso	M	s	2	iso	f	opp	35.5	Mila	26879	5	0.672	0.662958761	0.12332281	0.016574586
r19-011	15	f_l_4_ran	F	l	4	ran	f	same	35.5	Mila	55919	7	0.488	0.703392496	0.088051422	0.006138442
r19-011	16	m_l_2_ran	M	l	2	ran	f	opp	35.5	Mila		0			0
r19-011	17	post-playback					f		35.5	Mila		0			0
r19-026	0	acclimation					m		40	Mila		0			0
r19-026	1	m_s_2_ran	M	s	2	ran	m	same	40	Mila	2013	2	2.28	0.049533699	0.049213809	0.056103743
r19-026	2	m_s_4_iso	M	s	4	iso	m	same	40	Mila	1557	2	25.35	0.019332489	0.024832998	0.314758251
r19-026	3	m_l_4_ran	M	l	4	ran	m	same	40	Mila	6059	4	7257	0.077423394	0.051112985	0.092731733
r19-026	4	f_s_4_iso	F	s	4	iso	m	opp	40	Mila	5255	3	43122	0.065280314	0.037267544	0.535683673
r19-026	5	f_s_4_ran	F	s	4	ran	m	opp	40	Mila	13254	8	6432	0.166649902	0.100588442	0.080873108
r19-026	6	f_l_4_ran	F	l	4	ran	m	opp	40	Mila	17636	5	11156	0.222541894	0.063093075	0.140773269
r19-026	7	f_l_2_ran	F	l	2	ran	m	opp	40	Mila	11143	6	5002	0.277147689	0.149231458	0.124409292
r19-026	8	m_l_4_iso	M	l	4	iso	m	same	40	Mila	21459	7	23217	0.266591299	0.086963003	0.288431436
r19-026	9	m_s_4_ran	M	s	4	ran	m	same	40	Mila	27966	8	1987	0.345250735	0.098762994	0.024530259
r19-026	10	m_s_2_iso	M	s	2	iso	m	same	40	Mila	7.61	3	14967	0.189040143	0.074523052	0.371795509
r19-026	11	f_s_2_iso	F	s	2	iso	m	opp	40	Mila	11356	4	7039	0.280346607	0.098748364	0.173772434
r19-026	12	f_l_4_iso	F	l	4	iso	m	opp	40	Mila	19487	5	14637	0.240586187	0.061729919	0.180708166
r19-026	13	f_s_2_ran	F	s	2	ran	m	opp	40	Mila	8415	3	2.54	0.192347254	0.068572996	0.05805847
r19-026	14	f_l_2_iso	F	l	2	iso	m	opp	40	Mila	16461	5	3299	0.40145843	0.121942297	0.080457527
r19-026	15	m_l_2_ran	M	l	2	ran	m	same	40	Mila	18956	3	9339	0.468037826	0.074072245	0.230586899
r19-026	16	m_l_2_iso	M	l	2	iso	m	same	40	Mila	6808	4	2738	0.166056881	0.097565735	0.066783746
r19-026	17	post-playback					m		40	Mila		0			0

## Sheet: calls
seal_id	trial_nmb	trial_name	name_trial	trial_type	sex_pb	sex	annotator	nmb_of_looks	total_duration	latency	total_durationXsec	nmb_of_looksXsec	latencyXsec	nmb_of_l>90	total_durat_>90	latency_>90	total_durat_>90Xsec	nmb_of_l>90Xsec	latency_>90Xsec	nbr_of_reaction	tot_duration_reaction	latency_reaction	total_duration_reactionXsec	nmb_of_reactionXsec	latency_reactionXsec
r18-211	0	acclimation	acclimation	acclimation	F	M	Mila	11	161.561	71.795	0.538535	0.0366665	0.239316	3	92.632	101.624	0.308772	0.00999997	0.338746	14	254.193	71.795	93.1705	0.0466665	0.239316
r18-211	1	1_1	comp 4	comp	F	M	Mila	0	0	0	0	0	0	0	0	0	0	0	0	0	0	0	0	0	0
r18-211	2	1_2	comp 4	comp	F	M	Mila	0	0	0	0	0	0	0	0	0	0	0	0	0	0	0	0	0	0
r18-211	3	1_3	comp 4	comp	F	M	Mila	0	0	0	0	0	0	0	0	0	0	0	0	0	0	0	0	0	0
r18-211	4	1_4	comp 4	comp	F	M	Mila	0	0	0	0	0	0	0	0	0	0	0	0	0	0	0	0	0	0
r18-211	5	1_5	comp 4	comp	F	M	Mila	0	0	0	0	0	0	0	0	0	0	0	0	0	0	0	0	0	0
r18-211	6	1_6	comp 4	comp	F	M	Mila	0	0	0	0	0	0	0	0	0	0	0	0	0	0	0	0	0	0
r18-211	7	1_7	comp 4	comp	F	M	Mila	0	0	0	0	0	0	0	0	0	0	0	0	0	0	0	0	0	0
r18-211	8	1_8	comp 4	comp	F	M	Mila	0	0	0	0	0	0	0	0	0	0	0	0	0	0	0	0	0	0
r18-211	9	1_9	comp 4	comp	F	M	Mila	0	0	0	0	0	0	0	0	0	0	0	0	0	0	0	0	0	0
r18-211	10	1_10	comp 4	comp	F	M	Mila	0	0	0	0	0	0	0	0	0	0	0	0	0	0	0	0	0	0
r18-211	11	2_1	comp 3	comp	F	M	Mila	0	0	0	0	0	0	0	0	0	0	0	0	0	0	0	0	0	0
r18-211	12	2_2	comp 3	comp	F	M	Mila	0	0	0	0	0	0	0	0	0	0	0	0	0	0	0	0	0	0
r18-211	13	2_3	comp 3	comp	F	M	Mila	0	0	0	0	0	0	0	0	0	0	0	0	0	0	0	0	0	0
r18-211	14	2_4	comp 3	comp	F	M	Mila	0	0	0	0	0	0	0	0	0	0	0	0	0	0	0	0	0	0
r18-211	15	2_5	comp 3	comp	F	M	Mila	0	0	0	0	0	0	0	0	0	0	0	0	0	0	0	0	0	0
r18-211	16	2_6	comp 3	comp	F	M	Mila	1	1.779	4.22	0.2965	0.166667	0.703333	0	0	0	0	0	0	1	1.779	4.22	0.2965	0.166667	0.703333
r18-211	17	2_7	comp 3	comp	F	M	Mila	0	0	0	0	0	0	0	0	0	0	0	0	0	0	0	0	0	0
r18-211	18	2_8	comp 3	comp	F	M	Mila	0	0	0	0	0	0	0	0	0	0	0	0	0	0	0	0	0	0
r18-211	19	2_9	comp 3	comp	F	M	Mila	1	2.986	3.013	0.497667	0.166667	0.502167	0	0	0	0	0	0	1	2.986	3.013	0.497667	0.166667	0.502167
r18-211	20	2_10	comp 3	comp	F	M	Mila	0	0	0	0	0	0	0	0	0	0	0	0	0	0	0	0	0	0
r18-211	21	3_1	ctrl 2	ctrl	F	M	Mila	0	0	0	0	0	0	0	0	0	0	0	0	0	0	0	0	0	0
r18-211	22	3_2	ctrl 2	ctrl	F	M	Mila	0	0	0	0	0	0	0	0	0	0	0	0	0	0	0	0	0	0
r18-211	23	3_3	ctrl 2	ctrl	F	M	Mila	1	5.413	0.586	0.902167	0.166667	0.0976667	0	0	0	0	0	0	1	5.413	0.586	0.902167	0.166667	0.0976667
r18-211	24	3_4	ctrl 2	ctrl	F	M	Mila	0	0	0	0	0	0	0	0	0	0	0	0	0	0	0	0	0	0
r18-211	25	3_5	ctrl 2	ctrl	F	M	Mila	0	0	0	0	0	0	0	0	0	0	0	0	0	0	0	0	0	0
r18-211	26	3_6	ctrl 2	ctrl	F	M	Mila	0	0	0	0	0	0	0	0	0	0	0	0	0	0	0	0	0	0
r18-211	27	3_7	ctrl 2	ctrl	F	M	Mila	0	0	0	0	0	0	0	0	0	0	0	0	0	0	0	0	0	0
r18-211	28	3_8	ctrl 2	ctrl	F	M	Mila	1	3.558	2.441	0.593	0.166667	0.406833	0	0	0	0	0	0	1	3.558	2.441	0.593	0.166667	0.406833
r18-211	29	3_9	ctrl 2	ctrl	F	M	Mila	1	0.759	2.442	0.1265	0.166667	0.407	0	0	0	0	0	0	1	0.759	2.442	0.1265	0.166667	0.407
r18-211	30	3_10	ctrl 2	ctrl	F	M	Mila	0	0	0	0	0	0	0	0	0	0	0	0	0	0	0	0	0	0
r18-211	31	4_1	comp 1	comp	F	M	Mila	0	0	0	0	0	0	0	0	0	0	0	0	0	0	0	0	0	0
r18-211	32	4_2	comp 1	comp	F	M	Mila	1	1.514	4.362	0.252333	0.166667	0.727	0	0	0	0	0	0	1	1.514	4.362	0.252333	0.166667	0.727
r18-211	33	4_3	comp 1	comp	F	M	Mila	0	0	0	0	0	0	0	0	0	0	0	0	0	0	0	0	0	0
r18-211	34	4_4	comp 1	comp	F	M	Mila	0	0	0	0	0	0	0	0	0	0	0	0	0	0	0	0	0	0
r18-211	35	4_5	comp 1	comp	F	M	Mila	0	0	0	0	0	0	0	0	0	0	0	0	0	0	0	0	0	0
r18-211	36	4_6	comp 1	comp	F	M	Mila	0	0	0	0	0	0	0	0	0	0	0	0	0	0	0	0	0	0
r18-211	37	4_7	comp 1	comp	F	M	Mila	1	3.807	1.562	0.6345	0.166667	0.260333	0	0	0	0	0	0	1	3.807	1.562	0.6345	0.166667	0.260333
r18-211	38	4_8	comp 1	comp	F	M	Mila	0	0	0	0	0	0	0	0	0	0	0	0	0	0	0	0	0	0
r18-211	39	4_9	comp 1	comp	F	M	Mila	0	0	0	0	0	0	0	0	0	0	0	0	0	0	0	0	0	0
r18-211	40	4_10	comp 1	comp	F	M	Mila	0	0	0	0	0	0	0	0	0	0	0	0	0	0	0	0	0	0
r18-211	41	5_1	ctrl 3	ctrl	F	M	Mila	0	0	0	0	0	0	0	0	0	0	0	0	0	0	0	0	0	0
r18-211	42	5_2	ctrl 3	ctrl	F	M	Mila	0	0	0	0	0	0	0	0	0	0	0	0	0	0	0	0	0	0
r18-211	43	5_3	ctrl 3	ctrl	F	M	Mila	0	0	0	0	0	0	0	0	0	0	0	0	0	0	0	0	0	0
r18-211	44	5_4	ctrl 3	ctrl	F	M	Mila	0	0	0	0	0	0	0	0	0	0	0	0	0	0	0	0	0	0
r18-211	45	5_5	ctrl 3	ctrl	F	M	Mila	0	0	0	0	0	0	0	0	0	0	0	0	0	0	0	0	0	0
r18-211	46	5_6	ctrl 3	ctrl	F	M	Mila	0	0	0	0	0	0	0	0	0	0	0	0	0	0	0	0	0	0
r18-211	47	5_7	ctrl 3	ctrl	F	M	Mila	1	1.025	2.122	0.170833	0.166667	0.353667	0	0	0	0	0	0	1	1.025	2.122	0.170833	0.166667	0.353667
r18-211	48	5_8	ctrl 3	ctrl	F	M	Mila	0	0	0	0	0	0	0	0	0	0	0	0	0	0	0	0	0	0
r18-211	49	5_9	ctrl 3	ctrl	F	M	Mila	0	0	0	0	0	0	0	0	0	0	0	0	0	0	0	0	0	0
r18-211	50	5_10	ctrl 3	ctrl	F	M	Mila	0	0	0	0	0	0	0	0	0	0	0	0	0	0	0	0	0	0
r18-211	51	6_1	ctrl 1	ctrl	F	M	Mila	0	0	0	0	0	0	0	0	0	0	0	0	0	0	0	0	0	0
r18-211	52	6_2	ctrl 1	ctrl	F	M	Mila	0	0	0	0	0	0	0	0	0	0	0	0	0	0	0	0	0	0
r18-211	53	6_3	ctrl 1	ctrl	F	M	Mila	0	0	0	0	0	0	0	0	0	0	0	0	0	0	0	0	0	0
r18-211	54	6_4	ctrl 1	ctrl	F	M	Mila	0	0	0	0	0	0	0	0	0	0	0	0	0	0	0	0	0	0
r18-211	55	6_5	ctrl 1	ctrl	F	M	Mila	0	0	0	0	0	0	0	0	0	0	0	0	0	0	0	0	0	0
r18-211	56	6_6	ctrl 1	ctrl	F	M	Mila	0	0	0	0	0	0	0	0	0	0	0	0	0	0	0	0	0	0
r18-211	57	6_7	ctrl 1	ctrl	F	M	Mila	0	0	0	0	0	0	0	0	0	0	0	0	0	0	0	0	0	0
r18-211	58	6_8	ctrl 1	ctrl	F	M	Mila	0	0	0	0	0	0	0	0	0	0	0	0	0	0	0	0	0	0
r18-211	59	6_9	ctrl 1	ctrl	F	M	Mila	0	0	0	0	0	0	0	0	0	0	0	0	0	0	0	0	0	0
r18-211	60	6_10	ctrl 1	ctrl	F	M	Mila	1	3.241	1.391	0.540167	0.166667	0.231833	0	0	0	0	0	0	1	3.241	1.391	0.540167	0.166667	0.231833
r18-211	61	7_1	ctrl 4	ctrl	F	M	Mila	0	0	0	0	0	0	0	0	0	0	0	0	0	0	0	0	0	0
r18-211	62	7_2	ctrl 4	ctrl	F	M	Mila	2	2.151	1.529	0.3585	0.333333	0.254833	0	0	0	0	0	0	2	2.151	1.529	0.3585	0.333333	0.254833
r18-211	63	7_3	ctrl 4	ctrl	F	M	Mila	0	0	0	0	0	0	0	0	0	0	0	0	0	0	0	0	0	0
r18-211	64	7_4	ctrl 4	ctrl	F	M	Mila	0	0	0	0	0	0	0	0	0	0	0	0	0	0	0	0	0	0
r18-211	65	7_5	ctrl 4	ctrl	F	M	Mila	0	0	0	0	0	0	0	0	0	0	0	0	0	0	0	0	0	0
r18-211	66	7_6	ctrl 4	ctrl	F	M	Mila	0	0	0	0	0	0	0	0	0	0	0	0	0	0	0	0	0	0
r18-211	67	7_7	ctrl 4	ctrl	F	M	Mila	0	0	0	0	0	0	0	0	0	0	0	0	0	0	0	0	0	0
r18-211	68	7_8	ctrl 4	ctrl	F	M	Mila	1	1.987	0.442	0.331167	0.166667	0.0736667	0	0	0	0	0	0	1	1.987	0.442	0.331167	0.166667	0.0736667
r18-211	69	7_9	ctrl 4	ctrl	F	M	Mila	1	2.771	2.582	0.461833	0.166667	0.430333	0	0	0	0	0	0	1	2.771	2.582	0.461833	0.166667	0.430333
r18-211	70	7_10	ctrl 4	ctrl	F	M	Mila	0	0	0	0	0	0	0	0	0	0	0	0	0	0	0	0	0	0
r18-211	71	8_1	comp 2	comp	F	M	Mila	0	0	0	0	0	0	0	0	0	0	0	0	0	0	0	0	0	0
r18-211	72	8_2	comp 2	comp	F	M	Mila	0	0	0	0	0	0	0	0	0	0	0	0	0	0	0	0	0	0
r18-211	73	8_3	comp 2	comp	F	M	Mila	0	0	0	0	0	0	0	0	0	0	0	0	0	0	0	0	0	0
r18-211	74	8_4	comp 2	comp	F	M	Mila	0	0	0	0	0	0	0	0	0	0	0	0	0	0	0	0	0	0
r18-211	75	8_5	comp 2	comp	F	M	Mila	0	0	0	0	0	0	0	0	0	0	0	0	0	0	0	0	0	0
r18-211	76	8_6	comp 2	comp	F	M	Mila	0	0	0	0	0	0	0	0	0	0	0	0	0	0	0	0	0	0
r18-211	77	8_7	comp 2	comp	F	M	Mila	0	0	0	0	0	0	0	0	0	0	0	0	0	0	0	0	0	0
r18-211	78	8_8	comp 2	comp	F	M	Mila	0	0	0	0	0	0	0	0	0	0	0	0	0	0	0	0	0	0
r18-211	79	8_9	comp 2	comp	F	M	Mila	0	0	0	0	0	0	0	0	0	0	0	0	0	0	0	0	0	0
r18-211	80	8_10	comp 2	comp	F	M	Mila	0	0	0	0	0	0	0	0	0	0	0	0	0	0	0	0	0	0
r18-211	81	post-playback	post-playback	post-playback	F	M	Mila	0	0	0	0	0	0	0	0	0	0	0	0	0	0	0	0	0	0
r19-042	0	acclimation	acclimation	acclimation	M	M	Mila	1	4.261	28.43	0.0683367	0.0160377	0.455952	1	2.263	28.93	0.0362934	0.0160377	0.463971	2	6.524	28.43	2.33134	0.0320754	0.455952
r19-042	1	1_1	ctrl 4	ctrl	M	M	Mila	0	0	0	0	0	0	0	0	0	0	0	0	0	0	0	0	0	0
r19-042	2	1_2	ctrl 4	ctrl	M	M	Mila	0	0	0	0	0	0	0	0	0	0	0	0	0	0	0	0	0	0
r19-042	3	1_3	ctrl 4	ctrl	M	M	Mila	0	0	0	0	0	0	0	0	0	0	0	0	0	0	0	0	0	0
r19-042	4	1_4	ctrl 4	ctrl	M	M	Mila	1	3.523	2.476	0.587167	0.166667	0.412667	0	0	0	0	0	0	1	3.523	2.476	0.587167	0.166667	0.412667
r19-042	5	1_5	ctrl 4	ctrl	M	M	Mila	0	0	0	0	0	0	1	1.747	1.359	0.291167	0.166667	0.2265	1	1.747	1.359	1.747	0.166667	0.2265
r19-042	6	1_6	ctrl 4	ctrl	M	M	Mila	0	0	0	0	0	0	0	0	0	0	0	0	0	0	0	0	0	0
r19-042	7	1_7	ctrl 4	ctrl	M	M	Mila	1	0.749	1.259	0.124833	0.166667	0.209833	0	0	0	0	0	0	1	0.749	1.259	0.124833	0.166667	0.209833
r19-042	8	1_8	ctrl 4	ctrl	M	M	Mila	0	0	0	0	0	0	0	0	0	0	0	0	0	0	0	0	0	0
r19-042	9	1_9	ctrl 4	ctrl	M	M	Mila	0	0	0	0	0	0	0	0	0	0	0	0	0	0	0	0	0	0
r19-042	10	1_10	ctrl 4	ctrl	M	M	Mila	0	0	0	0	0	0	0	0	0	0	0	0	0	0	0	0	0	0
r19-042	11	2_1	comp 2	comp	M	M	Mila	1	4.109	1.89	0.684833	0.166667	0.315	1	1.251	4.2	0.2085	0.166667	0.7	2	5.36	1.89	1.93583	0.333333	0.315
r19-042	12	2_2	comp 2	comp	M	M	Mila	0	0	0	0	0	0	1	3.5	0.703	0.583333	0.166667	0.117167	1	3.5	0.703	3.5	0.166667	0.117167
r19-042	13	2_3	comp 2	comp	M	M	Mila	0	0	0	0	0	0	0	0	0	0	0	0	0	0	0	0	0	0
r19-042	14	2_4	comp 2	comp	M	M	Mila	0	0	0	0	0	0	0	0	0	0	0	0	0	0	0	0	0	0
r19-042	15	2_5	comp 2	comp	M	M	Mila	1	4	1.18	0.666778	0.166694	0.196699	0	0	0	0	0	0	1	4	1.18	0.666778	0.166694	0.196667
r19-042	16	2_6	comp 2	comp	M	M	Mila	2	3.063	0.869	0.5105	0.333333	0.144833	0	0	0	0	0	0	2	3.063	0.869	0.5105	0.333333	0.144833
r19-042	17	2_7	comp 2	comp	M	M	Mila	0	0	0	0	0	0	0	0	0	0	0	0	0	0	0	0	0	0
r19-042	18	2_8	comp 2	comp	M	M	Mila	1	4.686	1.313	0.78113	0.166694	0.21887	0	0	0	0	0	0	1	4.686	1.313	0.78113	0.166694	0.218833
r19-042	19	2_9	comp 2	comp	M	M	Mila	1	0.5	2.812	0.0833333	0.166667	0.468667	0	0	0	0	0	0	1	0.5	2.812	0.0833333	0.166667	0.468667
r19-042	20	2_10	comp 2	comp	M	M	Mila	0	0	0	0	0	0	0	0	0	0	0	0	0	0	0	0	0	0
r19-042	21	3_1	ctrl 3	ctrl	M	M	Mila	0	0	0	0	0	0	0	0	0	0	0	0	0	0	0	0	0	0
r19-042	22	3_2	ctrl 3	ctrl	M	M	Mila	0	0	0	0	0	0	0	0	0	0	0	0	0	0	0	0	0	0
r19-042	23	3_3	ctrl 3	ctrl	M	M	Mila	0	0	0	0	0	0	0	0	0	0	0	0	0	0	0	0	0	0
r19-042	24	3_4	ctrl 3	ctrl	M	M	Mila	1	2.617	3.382	0.436239	0.166694	0.563761	0	0	0	0	0	0	1	2.617	3.382	0.436239	0.166694	0.563667
r19-042	25	3_5	ctrl 3	ctrl	M	M	Mila	1	3.365	2.634	0.560833	0.166667	0.439	1	0.229	5.77	0.0381667	0.166667	0.961667	2	3.594	2.634	0.789833	0.333333	0.439
r19-042	26	3_6	ctrl 3	ctrl	M	M	Mila	0	0	0	0	0	0	1	0.752	2.61	0.125333	0.166667	0.435	1	0.752	2.61	0.752	0.166667	0.435
r19-042	27	3_7	ctrl 3	ctrl	M	M	Mila	1	2.307	3.692	0.3845	0.166667	0.615333	1	0.068	5.931	0.0113333	0.166667	0.9885	2	2.375	3.692	0.4525	0.333333	0.615333
r19-042	28	3_8	ctrl 3	ctrl	M	M	Mila	0	0	0	0	0	0	0	0	0	0	0	0	0	0	0	0	0	0
r19-042	29	3_9	ctrl 3	ctrl	M	M	Mila	0	0	0	0	0	0	0	0	0	0	0	0	0	0	0	0	0	0
r19-042	30	3_10	ctrl 3	ctrl	M	M	Mila	0	0	0	0	0	0	0	0	0	0	0	0	0	0	0	0	0	0
r19-042	31	4_1	comp 3	comp	M	M	Mila	0	0	0	0	0	0	0	0	0	0	0	0	0	0	0	0	0	0
r19-042	32	4_2	comp 3	comp	M	M	Mila	1	0.767	5.232	0.127833	0.166667	0.872	0	0	0	0	0	0	1	0.767	5.232	0.127833	0.166667	0.872
r19-042	33	4_3	comp 3	comp	M	M	Mila	0	0	0	0	0	0	1	2.5	0.982	0.416667	0.166667	0.163667	1	2.5	0.982	2.5	0.166667	0.163667
r19-042	34	4_4	comp 3	comp	M	M	Mila	2	1.633	2.111	0.272212	0.333389	0.351892	0	0	0	0	0	0	2	1.633	2.111	0.272212	0.333389	0.351833
r19-042	35	4_5	comp 3	comp	M	M	Mila	0	0	0	0	0	0	0	0	0	0	0	0	0	0	0	0	0	0
r19-042	36	4_6	comp 3	comp	M	M	Mila	0	0	0	0	0	0	0	0	0	0	0	0	0	0	0	0	0	0
r19-042	37	4_7	comp 3	comp	M	M	Mila	0	0	0	0	0	0	0	0	0	0	0	0	0	0	0	0	0	0
r19-042	38	4_8	comp 3	comp	M	M	Mila	0	0	0	0	0	0	0	0	0	0	0	0	0	0	0	0	0	0
r19-042	39	4_9	comp 3	comp	M	M	Mila	1	2.32	3.679	0.386667	0.166667	0.613167	0	0	0	0	0	0	1	2.32	3.679	0.386667	0.166667	0.613167
r19-042	40	4_10	comp 3	comp	M	M	Mila	0	0	0	0	0	0	0	0	0	0	0	0	0	0	0	0	0	0
r19-042	41	5_1	ctrl 1	ctrl	M	M	Mila	1	3.751	1.302	0.625167	0.166667	0.217	0	0	0	0	0	0	1	3.751	1.302	0.625167	0.166667	0.217
r19-042	42	5_2	ctrl 1	ctrl	M	M	Mila	1	4.697	1.302	0.782833	0.166667	0.217	0	0	0	0	0	0	1	4.697	1.302	0.782833	0.166667	0.217
r19-042	43	5_3	ctrl 1	ctrl	M	M	Mila	0	0	0	0	0	0	0	0	0	0	0	0	0	0	0	0	0	0
r19-042	44	5_4	ctrl 1	ctrl	M	M	Mila	0	0	0	0	0	0	0	0	0	0	0	0	0	0	0	0	0	0
r19-042	45	5_5	ctrl 1	ctrl	M	M	Mila	0	0	0	0	0	0	0	0	0	0	0	0	0	0	0	0	0	0
r19-042	46	5_6	ctrl 1	ctrl	M	M	Mila	1	4.181	1.181	0.696949	0.166694	0.196866	0	0	0	0	0	0	1	4.181	1.181	0.696949	0.166694	0.196833
r19-042	47	5_7	ctrl 1	ctrl	M	M	Mila	0	0	0	0	0	0	0	0	0	0	0	0	0	0	0	0	0	0
r19-042	48	5_8	ctrl 1	ctrl	M	M	Mila	0	0	0	0	0	0	0	0	0	0	0	0	0	0	0	0	0	0
r19-042	49	5_9	ctrl 1	ctrl	M	M	Mila	0	0	0	0	0	0	0	0	0	0	0	0	0	0	0	0	0	0
r19-042	50	5_10	ctrl 1	ctrl	M	M	Mila	0	0	0	0	0	0	0	0	0	0	0	0	0	0	0	0	0	0
r19-042	51	6_1	comp 4	comp	M	M	Mila	0	0	0	0	0	0	0	0	0	0	0	0	0	0	0	0	0	0
r19-042	52	6_2	comp 4	comp	M	M	Mila	0	0	0	0	0	0	0	0	0	0	0	0	0	0	0	0	0	0
r19-042	53	6_3	comp 4	comp	M	M	Mila	0	0	0	0	0	0	0	0	0	0	0	0	0	0	0	0	0	0
r19-042	54	6_4	comp 4	comp	M	M	Mila	0	0	0	0	0	0	0	0	0	0	0	0	0	0	0	0	0	0
r19-042	55	6_5	comp 4	comp	M	M	Mila	0	0	0	0	0	0	0	0	0	0	0	0	0	0	0	0	0	0
r19-042	56	6_6	comp 4	comp	M	M	Mila	1	4.747	1.252	0.791299	0.166694	0.208701	0	0	0	0	0	0	1	4.747	1.252	0.791299	0.166694	0.208667
r19-042	57	6_7	comp 4	comp	M	M	Mila	0	0	0	0	0	0	0	0	0	0	0	0	0	0	0	0	0	0
r19-042	58	6_8	comp 4	comp	M	M	Mila	0	0	0	0	0	0	0	0	0	0	0	0	0	0	0	0	0	0
r19-042	59	6_9	comp 4	comp	M	M	Mila	1	4.499	0.501	0.749958	0.166694	0.0835139	0	0	0	0	0	0	1	4.499	0.501	0.749958	0.166694	0.0835
r19-042	60	6_10	comp 4	comp	M	M	Mila	2	0.498	2.253	0.083	0.333333	0.3755	0	0	0	0	0	0	2	0.498	2.253	0.083	0.333333	0.3755
r19-042	61	7_1	comp 1	comp	M	M	Mila	0	0	0	0	0	0	0	0	0	0	0	0	0	0	0	0	0	0
r19-042	62	7_2	comp 1	comp	M	M	Mila	1	2.5	0.59	0.416736	0.166694	0.0983497	0	0	0	0	0	0	1	2.5	0.59	0.416736	0.166694	0.0983333
r19-042	63	7_3	comp 1	comp	M	M	Mila	0	0	0	0	0	0	0	0	0	0	0	0	0	0	0	0	0	0
r19-042	64	7_4	comp 1	comp	M	M	Mila	0	0	0	0	0	0	0	0	0	0	0	0	0	0	0	0	0	0
r19-042	65	7_5	comp 1	comp	M	M	Mila	0	0	0	0	0	0	0	0	0	0	0	0	0	0	0	0	0	0
r19-042	66	7_6	comp 1	comp	M	M	Mila	0	0	0	0	0	0	0	0	0	0	0	0	0	0	0	0	0	0
r19-042	67	7_7	comp 1	comp	M	M	Mila	1	3.084	1.092	0.514	0.166667	0.182	0	0	0	0	0	0	1	3.084	1.092	0.514	0.166667	0.182
r19-042	68	7_8	comp 1	comp	M	M	Mila	1	1.255	2.926	0.209202	0.166694	0.487748	0	0	0	0	0	0	1	1.255	2.926	0.209202	0.166694	0.487667
r19-042	69	7_9	comp 1	comp	M	M	Mila	0	0	0	0	0	0	0	0	0	0	0	0	0	0	0	0	0	0
r19-042	70	7_10	comp 1	comp	M	M	Mila	2	1.318	1.43	0.219667	0.333333	0.238333	0	0	0	0	0	0	2	1.318	1.43	0.219667	0.333333	0.238333
r19-042	71	8_1	ctrl 2	ctrl	M	M	Mila	0	0	0	0	0	0	0	0	0	0	0	0	0	0	0	0	0	0
r19-042	72	8_2	ctrl 2	ctrl	M	M	Mila	0	0	0	0	0	0	0	0	0	0	0	0	0	0	0	0	0	0
r19-042	73	8_3	ctrl 2	ctrl	M	M	Mila	0	0	0	0	0	0	0	0	0	0	0	0	0	0	0	0	0	0
r19-042	74	8_4	ctrl 2	ctrl	M	M	Mila	0	0	0	0	0	0	0	0	0	0	0	0	0	0	0	0	0	0
r19-042	75	8_5	ctrl 2	ctrl	M	M	Mila	0	0	0	0	0	0	0	0	0	0	0	0	0	0	0	0	0	0
r19-042	76	8_6	ctrl 2	ctrl	M	M	Mila	0	0	0	0	0	0	0	0	0	0	0	0	0	0	0	0	0	0
r19-042	77	8_7	ctrl 2	ctrl	M	M	Mila	0	0	0	0	0	0	0	0	0	0	0	0	0	0	0	0	0	0
r19-042	78	8_8	ctrl 2	ctrl	M	M	Mila	1	1.999	3.939	0.333167	0.166667	0.6565	0	0	0	0	0	0	1	1.999	3.939	0.333167	0.166667	0.6565
r19-042	79	8_9	ctrl 2	ctrl	M	M	Mila	0	0	0	0	0	0	0	0	0	0	0	0	0	0	0	0	0	0
r19-042	80	8_10	ctrl 2	ctrl	M	M	Mila	0	0	0	0	0	0	0	0	0	0	0	0	0	0	0	0	0	0
r19-042	81	post-playback	post-playback	post-playback	M	M	Mila	2	14.882	1.441	0.440009	0.0591331	0.0426054	0	0	0	0	0	0	2	14.882	1.441	0.440009	0.0591331	0.0426054
r19-158	0	acclimation	acclimation	acclimation	F	F	Mila	1	3.177	18.7	0.145221	0.0457101	0.854779	0	0	0	0	0	0	1	3.177	18.7	0.145221	0.0457101	0.854779
r19-158	1	1_1	comp 2	comp	F	F	Mila	0	0	0	0	0	0	0	0	0	0	0	0	0	0	0	0	0	0
r19-158	2	1_2	comp 2	comp	F	F	Mila	1	1.511	0.685	0.251833	0.166667	0.114167	0	0	0	0	0	0	1	1.511	0.685	0.251833	0.166667	0.114167
r19-158	3	1_3	comp 2	comp	F	F	Mila	0	0	0	0	0	0	0	0	0	0	0	0	0	0	0	0	0	0
r19-158	4	1_4	comp 2	comp	F	F	Mila	1	4.029	1.97	0.6715	0.166667	0.328333	0	0	0	0	0	0	1	4.029	1.97	0.6715	0.166667	0.328333
r19-158	5	1_5	comp 2	comp	F	F	Mila	0	0	0	0	0	0	0	0	0	0	0	0	0	0	0	0	0	0
r19-158	6	1_6	comp 2	comp	F	F	Mila	0	0	0	0	0	0	0	0	0	0	0	0	0	0	0	0	0	0
r19-158	7	1_7	comp 2	comp	F	F	Mila	1	3.494	2.505	0.582333	0.166667	0.4175	0	0	0	0	0	0	1	3.494	2.505	0.582333	0.166667	0.4175
r19-158	8	1_8	comp 2	comp	F	F	Mila	0	0	0	0	0	0	0	0	0	0	0	0	0	0	0	0	0	0
r19-158	9	1_9	comp 2	comp	F	F	Mila	0	0	0	0	0	0	0	0	0	0	0	0	0	0	0	0	0	0
r19-158	11	2_1	comp 4	comp	F	F	Mila	1	1.778	1.885	0.296333	0.166667	0.314167	0	0	0	0	0	0	1	1.778	1.885	0.296333	0.166667	0.314167
r19-158	12	2_2	comp 4	comp	F	F	Mila	0	0	0	0	0	0	0	0	0	0	0	0	0	0	0	0	0	0
r19-158	13	2_3	comp 4	comp	F	F	Mila	1	4.627	1.372	0.771167	0.166667	0.228667	0	0	0	0	0	0	1	4.627	1.372	0.771167	0.166667	0.228667
r19-158	14	2_4	comp 4	comp	F	F	Mila	0	0	0	0	0	0	1	2.007	0.976	0.3345	0.166667	0.162667	1	2.007	0.976	2.007	0.166667	0.162667
r19-158	15	2_5	comp 4	comp	F	F	Mila	1	2.155	3.844	0.359167	0.166667	0.640667	0	0	0	0	0	0	1	2.155	3.844	0.359167	0.166667	0.640667
r19-158	16	2_6	comp 4	comp	F	F	Mila	0	0	0	0	0	0	0	0	0	0	0	0	0	0	0	0	0	0
r19-158	17	2_7	comp 4	comp	F	F	Mila	1	5.3726	0.627	0.895433	0.166667	0.1045	0	0	0	0	0	0	1	5.3726	0.627	0.895433	0.166667	0.1045
r19-158	18	2_8	comp 4	comp	F	F	Mila	1	5.124	0.875	0.854	0.166667	0.145833	1	2.7	2.512	0.45	0.166667	0.418667	2	7.824	0.875	3.554	0.333333	0.145833
r19-158	19	2_9	comp 4	comp	F	F	Mila	0	0	0	0	0	0	1	1.763	0.424	0.293833	0.166667	0.0706667	1	1.763	0.424	1.763	0.166667	0.0706667
r19-158	20	2_10	comp 4	comp	F	F	Mila	1	2.763	0.504	0.4605	0.166667	0.084	0	0	0	0	0	0	1	2.763	0.504	0.4605	0.166667	0.084
r19-158	21	3_1	ctrl 1	ctrl	F	F	Mila	0	0	0	0	0	0	0	0	0	0	0	0	0	0	0	0	0	0
r19-158	22	3_2	ctrl 1	ctrl	F	F	Mila	0	0	0	0	0	0	0	0	0	0	0	0	0	0	0	0	0	0
r19-158	23	3_3	ctrl 1	ctrl	F	F	Mila	1	4.854	1.145	0.809	0.166667	0.190833	0	0	0	0	0	0	1	4.854	1.145	0.809	0.166667	0.190833
r19-158	24	3_4	ctrl 1	ctrl	F	F	Mila	0	0	0	0	0	0	0	0	0	0	0	0	0	0	0	0	0	0
r19-158	25	3_5	ctrl 1	ctrl	F	F	Mila	1	3.768	1.655	0.628	0.166667	0.275833	0	0	0	0	0	0	1	3.768	1.655	0.628	0.166667	0.275833
r19-158	26	3_6	ctrl 1	ctrl	F	F	Mila	0	0	0	0	0	0	0	0	0	0	0	0	0	0	0	0	0	0
r19-158	27	3_7	ctrl 1	ctrl	F	F	Mila	0	0	0	0	0	0	0	0	0	0	0	0	0	0	0	0	0	0
r19-158	28	3_8	ctrl 1	ctrl	F	F	Mila	0	0	0	0	0	0	0	0	0	0	0	0	0	0	0	0	0	0
r19-158	29	3_9	ctrl 1	ctrl	F	F	Mila	0	0	0	0	0	0	0	0	0	0	0	0	0	0	0	0	0	0
r19-158	30	3_10	ctrl 1	ctrl	F	F	Mila	0	0	0	0	0	0	0	0	0	0	0	0	0	0	0	0	0	0
r19-158	31	4_1	ctrl 3	ctrl	F	F	Mila	0	0	0	0	0	0	1	2.251	1.154	0.375167	0.166667	0.192333	1	2.251	1.154	2.251	0.166667	0.192333
r19-158	32	4_2	ctrl 3	ctrl	F	F	Mila	1	1.912	2.956	0.318667	0.166667	0.492667	1	0.57	1.423	0.095	0.166667	0.237167	2	2.482	1.423	0.888667	0.333333	0.237167
r19-158	33	4_3	ctrl 3	ctrl	F	F	Mila	2	1.458	0.776	0.243	0.333333	0.129333	0	0	0	0	0	0	2	1.458	0.776	0.243	0.333333	0.129333
r19-158	34	4_4	ctrl 3	ctrl	F	F	Mila	1	7.229	5.626	1.20483	0.166667	0.937667	0	0	0	0	0	0	1	7.229	5.626	1.20483	0.166667	0.937667
r19-158	35	4_5	ctrl 3	ctrl	F	F	Mila	0	0	0	0	0	0	1	0.677	0.992	0.112833	0.166667	0.165333	1	0.677	0.992	0.677	0.166667	0.165333
r19-158	36	4_6	ctrl 3	ctrl	F	F	Mila	0	0	0	0	0	0	0	0	0	0	0	0	0	0	0	0	0	0
r19-158	37	4_7	ctrl 3	ctrl	F	F	Mila	1	3.747	2.252	0.6245	0.166667	0.375333	1	1.036	2.711	0.172667	0.166667	0.451833	2	4.783	2.252	1.6605	0.333333	0.375333
r19-158	38	4_8	ctrl 3	ctrl	F	F	Mila	0	0	0	0	0	0	0	0	0	0	0	0	0	0	0	0	0	0
r19-158	39	4_9	ctrl 3	ctrl	F	F	Mila	0	0	0	0	0	0	0	0	0	0	0	0	0	0	0	0	0	0
r19-158	40	4_10	ctrl 3	ctrl	F	F	Mila	1	1.772	4.227	0.295333	0.166667	0.7045	0	0	0	0	0	0	1	1.772	4.227	0.295333	0.166667	0.7045
r19-158	41	5_1	comp 1	comp	F	F	Mila	1	1.285	3.338	0.214167	0.166667	0.556333	0	0	0	0	0	0	1	1.285	3.338	0.214167	0.166667	0.556333
r19-158	42	5_2	comp 1	comp	F	F	Mila	0	0	0	0	0	0	0	0	0	0	0	0	0	0	0	0	0	0
r19-158	43	5_3	comp 1	comp	F	F	Mila	0	0	0	0	0	0	0	0	0	0	0	0	0	0	0	0	0	0
r19-158	44	5_4	comp 1	comp	F	F	Mila	0	0	0	0	0	0	0	0	0	0	0	0	0	0	0	0	0	0
r19-158	45	5_5	comp 1	comp	F	F	Mila	0	0	0	0	0	0	0	0	0	0	0	0	0	0	0	0	0	0
r19-158	46	5_6	comp 1	comp	F	F	Mila	0	0	0	0	0	0	0	0	0	0	0	0	0	0	0	0	0	0
r19-158	47	5_7	comp 1	comp	F	F	Mila	0	0	0	0	0	0	0	0	0	0	0	0	0	0	0	0	0	0
r19-158	48	5_8	comp 1	comp	F	F	Mila	0	0	0	0	0	0	0	0	0	0	0	0	0	0	0	0	0	0
r19-158	49	5_9	comp 1	comp	F	F	Mila	0	0	0	0	0	0	0	0	0	0	0	0	0	0	0	0	0	0
r19-158	50	5_10	comp 1	comp	F	F	Mila	0	0	0	0	0	0	0	0	0	0	0	0	0	0	0	0	0	0
r19-158	51	6_1	comp 3	comp	F	F	Mila	1	1.09	2.873	0.181667	0.166667	0.478833	0	0	0	0	0	0	1	1.09	2.873	0.181667	0.166667	0.478833
r19-158	52	6_2	comp 3	comp	F	F	Mila	0	0	0	0	0	0	0	0	0	0	0	0	0	0	0	0	0	0
r19-158	53	6_3	comp 3	comp	F	F	Mila	1	0.073	5.344	0.0121667	0.166667	0.890667	0	0	0	0	0	0	1	0.073	5.344	0.0121667	0.166667	0.890667
r19-158	54	6_4	comp 3	comp	F	F	Mila	1	5.207	0.792	0.867833	0.166667	0.132	1	1.246	3.093	0.207667	0.166667	0.5155	2	6.453	0.792	2.11383	0.333333	0.132
r19-158	55	6_5	comp 3	comp	F	F	Mila	0	0	0	0	0	0	1	1.499	4.347	0.249833	0.166667	0.7245	1	1.499	4.347	1.499	0.166667	0.7245
r19-158	56	6_6	comp 3	comp	F	F	Mila	1	1.992	2.897	0.332	0.166667	0.482833	0	0	0	0	0	0	1	1.992	2.897	0.332	0.166667	0.482833
r19-158	57	6_7	comp 3	comp	F	F	Mila	1	3.849	2.15	0.6415	0.166667	0.358333	1	2.208	3.791	0.368	0.166667	0.631833	2	6.057	2.15	2.8495	0.333333	0.358333
r19-158	58	6_8	comp 3	comp	F	F	Mila	0	0	0	0	0	0	0	0	0	0	0	0	0	0	0	0	0	0
r19-158	59	6_9	comp 3	comp	F	F	Mila	0	0	0	0	0	0	0	0	0	0	0	0	0	0	0	0	0	0
r19-158	60	6_10	comp 3	comp	F	F	Mila	0	0	0	0	0	0	0	0	0	0	0	0	0	0	0	0	0	0
r19-158	61	7_1	ctrl 2	ctrl	F	F	Mila	1	2.48	0.705	0.413333	0.166667	0.1175	0	0	0	0	0	0	1	2.48	0.705	0.413333	0.166667	0.1175
r19-158	62	7_2	ctrl 2	ctrl	F	F	Mila	0	0	0	0	0	0	0	0	0	0	0	0	0	0	0	0	0	0
r19-158	63	7_3	ctrl 2	ctrl	F	F	Mila	0	0	0	0	0	0	0	0	0	0	0	0	0	0	0	0	0	0
r19-158	64	7_4	ctrl 2	ctrl	F	F	Mila	1	0.683	5.316	0.113833	0.166667	0.886	0	0	0	0	0	0	1	0.683	5.316	0.113833	0.166667	0.886
r19-158	65	7_5	ctrl 2	ctrl	F	F	Mila	0	0	0	0	0	0	0	0	0	0	0	0	0	0	0	0	0	0
r19-158	66	7_6	ctrl 2	ctrl	F	F	Mila	0	0	0	0	0	0	0	0	0	0	0	0	0	0	0	0	0	0
r19-158	67	7_7	ctrl 2	ctrl	F	F	Mila	0	0	0	0	0	0	0	0	0	0	0	0	0	0	0	0	0	0
r19-158	68	7_8	ctrl 2	ctrl	F	F	Mila	0	0	0	0	0	0	0	0	0	0	0	0	0	0	0	0	0	0
r19-158	69	7_9	ctrl 2	ctrl	F	F	Mila	0	0	0	0	0	0	0	0	0	0	0	0	0	0	0	0	0	0
r19-158	70	7_10	ctrl 2	ctrl	F	F	Mila	1	2.957	3.042	0.492833	0.166667	0.507	0	0	0	0	0	0	1	2.957	3.042	0.492833	0.166667	0.507
r19-158	71	8_1	ctrl 4	ctrl	F	F	Mila	0	0	0	0	0	0	0	0	0	0	0	0	0	0	0	0	0	0
r19-158	72	8_2	ctrl 4	ctrl	F	F	Mila	0	0	0	0	0	0	1	5.749	0.25	0.958167	0.166667	0.0416667	1	5.749	0.25	5.749	0.166667	0.0416667
r19-158	73	8_3	ctrl 4	ctrl	F	F	Mila	0	0	0	0	0	0	0	0	0	0	0	0	0	0	0	0	0	0
r19-158	74	8_4	ctrl 4	ctrl	F	F	Mila	0	0	0	0	0	0	0	0	0	0	0	0	0	0	0	0	0	0
r19-158	75	8_5	ctrl 4	ctrl	F	F	Mila	0	0	0	0	0	0	0	0	0	0	0	0	0	0	0	0	0	0
r19-158	76	8_6	ctrl 4	ctrl	F	F	Mila	0	0	0	0	0	0	0	0	0	0	0	0	0	0	0	0	0	0
r19-158	77	8_7	ctrl 4	ctrl	F	F	Mila	0	0	0	0	0	0	1	1.754	4.132	0.292333	0.166667	0.688667	1	1.754	4.132	1.754	0.166667	0.688667
r19-158	78	8_8	ctrl 4	ctrl	F	F	Mila	0	0	0	0	0	0	0	0	0	0	0	0	0	0	0	0	0	0
r19-158	79	8_9	ctrl 4	ctrl	F	F	Mila	0	0	0	0	0	0	0	0	0	0	0	0	0	0	0	0	0	0
r19-158	80	8_10	ctrl 4	ctrl	F	F	Mila	0	0	0	0	0	0	0	0	0	0	0	0	0	0	0	0	0	0
r19-158	81	post-playback	post-playback	post-playback	F	F	Mila	4	87.785	1.358	0.477059	0.0217376	0.00737991	0	0	0	0	0	0	4	87.785	1.358	0.477059	0.0217376	0.00737991

## Sheet: blocks
seal_id	trial_nmb	trial_name	name_trial	trial_type	sex_pb	sex	annotator	nmb_of_looks	total_duration	latency	total_durationXsec	nmb_of_looksXsec	latencyXsec	nmb_of_l>90	total_durat_>90	latency_>90	total_durat_>90Xsec	nmb_of_l>90Xsec	latency_>90Xsec	nbr_of_reaction	nmb_turn_L	nmb_turn_R	tot_duration_reaction	latency_reaction	total_duration_reactionXsec	nmb_of_reactionXsec	latency_reactionXsec
r18-211	0	acclimation	acclimation	acclimation	F	M	Mila	11	161.561	71.795	0.538535	0.0366665	0.239316	3	92.632	101.624	0.308772	0.00999997	0.338746	14	-	-	254.193	71.795	0.847307	0.0466665	0.239316
r18-211	1	1	comp 4	comp	F	M	Mila	0	0	0	0	0	0	0	0	0	0	0	0	0	0	0	0	0	0	0	0
r18-211	2	2	comp 3	comp	F	M	Mila	2	4.765	34.22	0.079418	0.0333339	0.570343	0	0	0	0	0	0	2	0	2	4.765	34.22	0.079418	0.0333339	0.570343
r18-211	3	3	ctrl 2	ctrl	F	M	Mila	3	9.73	12.586	0.162169	0.0500008	0.20977	0	0	0	0	0	0	3	1	2	9.73	12.586	0.162169	0.0500008	0.20977
r18-211	4	4	comp 1	comp	F	M	Mila	2	5.321	10.362	0.0886848	0.0333339	0.172703	0	0	0	0	0	0	2	1	1	5.321	10.362	0.0886848	0.0333339	0.172703
r18-211	5	5	ctrl 3	ctrl	F	M	Mila	1	1.025	38.122	0.0170836	0.0166669	0.635377	0	0	0	0	0	0	1	0	1	1.025	38.122	0.0170836	0.0166669	0.635377
r18-211	6	6	ctrl 1	ctrl	F	M	Mila	1	3.241	55.391	0.0540176	0.0166669	0.923199	0	0	0	0	0	0	1	0	1	3.241	55.391	0.0540176	0.0166669	0.923199
r18-211	7	7	ctrl 4	ctrl	F	M	Mila	4	6.909	7.529	0.115152	0.0666678	0.125485	0	0	0	0	0	0	4	3	1	6.909	7.529	0.115152	0.0666678	0.125485
r18-211	8	8	comp 2	comp	F	M	Mila	0	0	0	0	0	0	0	0	0	0	0	0	0	0	0	0	0	0	0	0
r18-211	9	post-playback	post-playback	post-playback	F	M	Mila	0	0	0	0	0	0	0	0	0	0	0	0	0	-	-	0	0	0	0	0
r19-042	0	acclimation	acclimation	acclimation	M	M	Mila	1	4.261	28.43	0.0683367	0.0160377	0.455952	1	2.263	28.93	0.0362934	0.0160377	0.463971	2	-	-	6.524	28.43	0.10463	0.0320754	0.455952
r19-042	1	1	ctrl 4	ctrl	M	M	Mila	2	4.272	20.476	0.0712012	0.0333339	0.341272	1	1.747	25.359	0.0291172	0.0166669	0.422657	3	3	0	6.019	20.476	0.100318	0.0500008	0.341272
r19-042	2	2	comp 2	comp	M	M	Mila	6	16.358	1.89	0.272638	0.100002	0.0315005	2	4.751	4.2	0.0791847	0.0333339	0.0700012	8	6	2	21.109	4.2	0.351823	0.133336	0.0700012
r19-042	3	3	ctrl 3	ctrl	M	M	Mila	3	8.289	21.382	0.138152	0.0500008	0.356373	3	1.049	29.77	0.0174836	0.0500008	0.496175	6	1	5	9.338	21.382	0.155636	0.100002	0.356373
r19-042	4	4	comp 3	comp	M	M	Mila	4	4.72	11.232	0.078668	0.0666678	0.187203	1	2.5	12.982	0.0416674	0.0166669	0.21637	5	4	1	7.22	11.232	0.120335	0.0833347	0.187203
r19-042	5	5	ctrl 1	ctrl	M	M	Mila	3	13.266	1.302	0.221104	0.0500008	0.0217004	0	0	0	0	0	0	3	1	2	13.266	1.302	0.221104	0.0500008	0.0217004
r19-042	6	6	comp 4	comp	M	M	Mila	4	9.744	31.252	0.162403	0.0666678	0.520875	0	0	0	0	0	0	4	0	4	9.744	31.252	0.162403	0.0666678	0.520875
r19-042	7	7	comp 1	comp	M	M	Mila	5	8.157	6.59	0.135952	0.0833347	0.109835	0	0	0	0	0	0	5	2	3	8.157	6.59	0.135952	0.0833347	0.109835
r19-042	8	8	ctrl 2	ctrl	M	M	Mila	1	1.999	45.939	0.0333172	0.0166669	0.765663	0	0	0	0	0	0	1	1	0	1.999	45.939	0.0333172	0.0166669	0.765663
r19-042	9	post-playback	post-playback	post-playback	M	M	Mila	2	14.482	1.441	0.428183	0.0591331	0.0426054	0	0	0	0	0	0	2	-	-	14.482	1.441	0.428183	0.0591331	0.0426054
r19-158	0	acclimation	acclimation	acclimation	F	F	Mila	1	3.177	18.7	0.145221	0.0457101	0.854779	0	0	0	0	0	0	1	-	-	3.177	18.7	0.145221	0.0457101	0.854779
r19-158	1	1	comp 2	comp	F	F	Mila	3	9.034	6.685	0.167299	0.0555566	0.123799	0	0	0	0	0	0	3	2	1	9.034	6.685	0.167299	0.0555566	0.123799
r19-158	2	2	comp 4	comp	F	F	Mila	6	25.055	1.885	0.41759	0.100002	0.0314172	3	6.47	18.976	0.107835	0.0500008	0.316272	9	2	7	31.525	18.976	0.525425	0.150003	0.316272
r19-158	3	3	ctrl 1	ctrl	F	F	Mila	2	8.622	13.145	0.143702	0.0333339	0.219087	0	0	0	0	0	0	2	1	1	8.622	13.145	0.143702	0.0333339	0.219087
r19-158	4	4	ctrl 3	ctrl	F	F	Mila	6	7.49	8.956	0.124835	0.100002	0.149269	4	4.534	1.154	0.0755679	0.0666678	0.0192337	10	5	5	12.024	1.154	0.200403	0.166669	0.0192337
r19-158	5	5	comp 1	comp	F	F	Mila	1	1.285	3.338	0.021417	0.0166669	0.0556343	0	0	0	0	0	0	1	0	1	1.285	3.338	0.021417	0.0166669	0.0556343
r19-158	6	6	comp 3	comp	F	F	Mila	5	12.211	2.873	0.20352	0.0833347	0.0478841	3	4.953	21.093	0.0825514	0.0500008	0.351556	8	2	6	17.164	2.873	0.286071	0.133336	0.0478841
r19-158	7	7	ctrl 2	ctrl	F	F	Mila	3	6.12	0.705	0.102002	0.0500008	0.0117502	0	0	0	0	0	0	3	2	1	6.12	0.705	0.102002	0.0500008	0.0117502
r19-158	8	8	ctrl 4	ctrl	F	F	Mila	0	0	0	0	0	0	2	7.503	6.25	0.125052	0.0333339	0.104168	2	2	0	7.503	6.25	0.125052	0.0333339	0.104168
r19-158	9	post-playback	post-playback	post-playback	F	F	Mila	4	87.785	1.358	0.477059	0.0217376	0.00737991	0	0	0	0	0	0	4	-	-	87.785	1.358	0.477059	0.0217376	0.00737991
